# Supplementary material for: Establishment of a Cell Suspension Culture of Ageratina pichinchensis (Kunth) for the Improved Production of Anti-Inflammatory Compounds
Source: MDPI journal article supplement (doi:10.3390/plants9101398), 2020-10-21
Supplement: s1 [file s1]

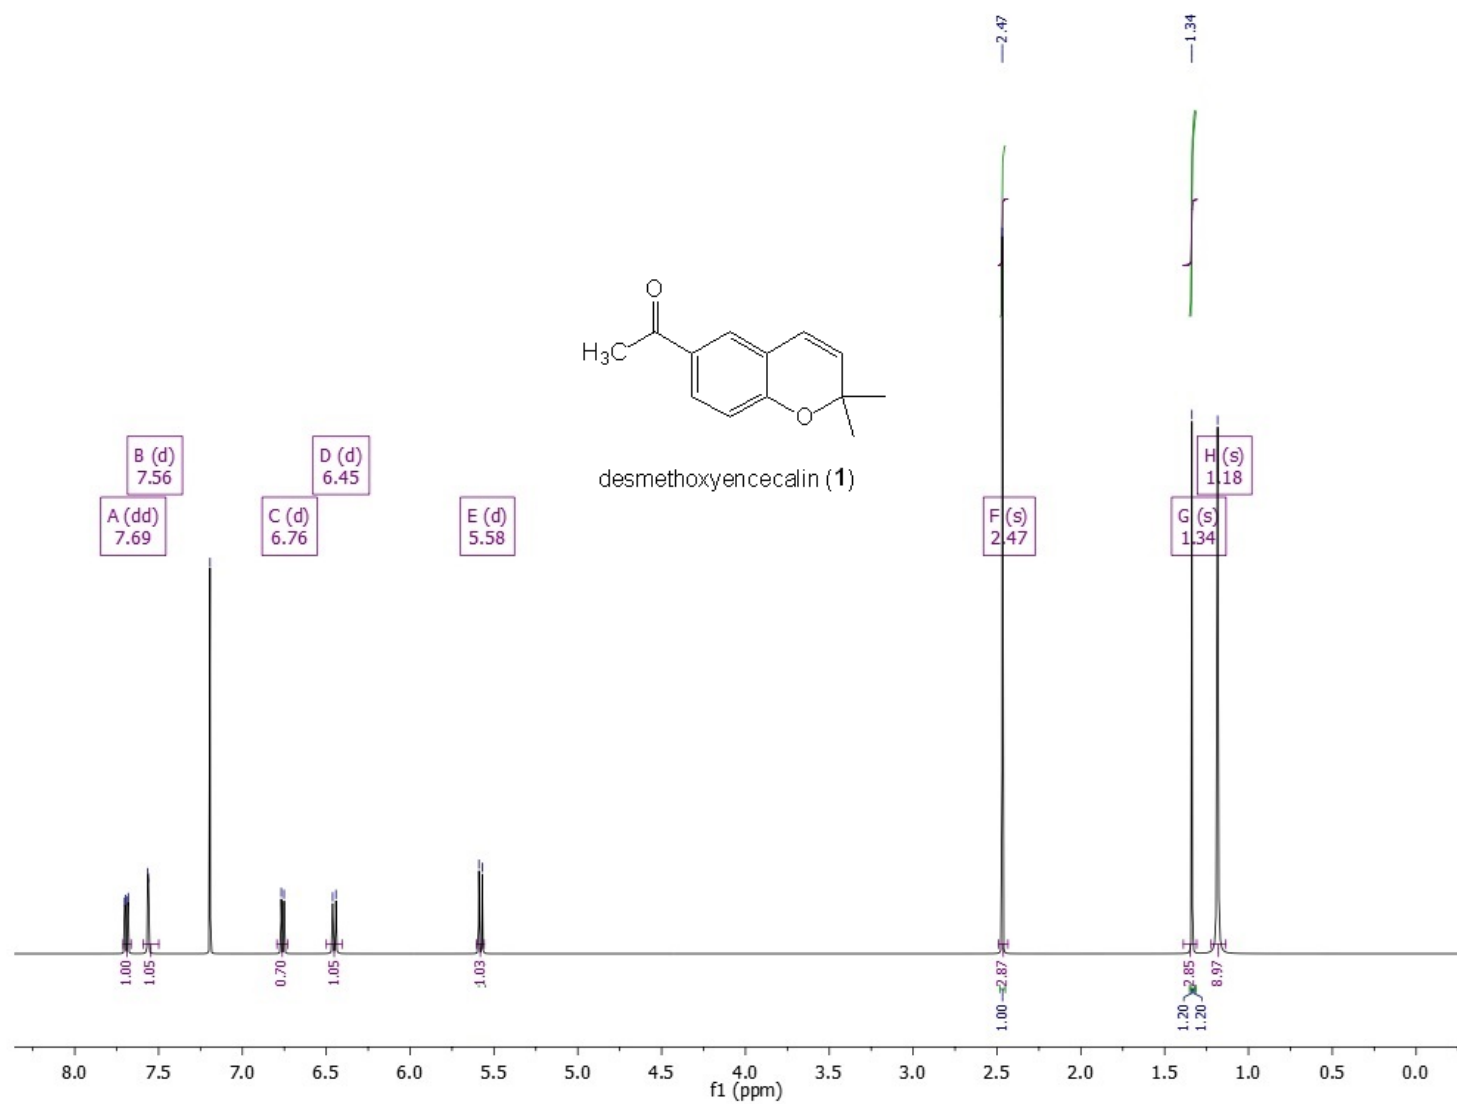

**Figure S1.**  $^1\text{H}$ -NMR spectrum (200 MHz,  $\text{CDCl}_3$ ) of desmethoxyencecalin (**1**).

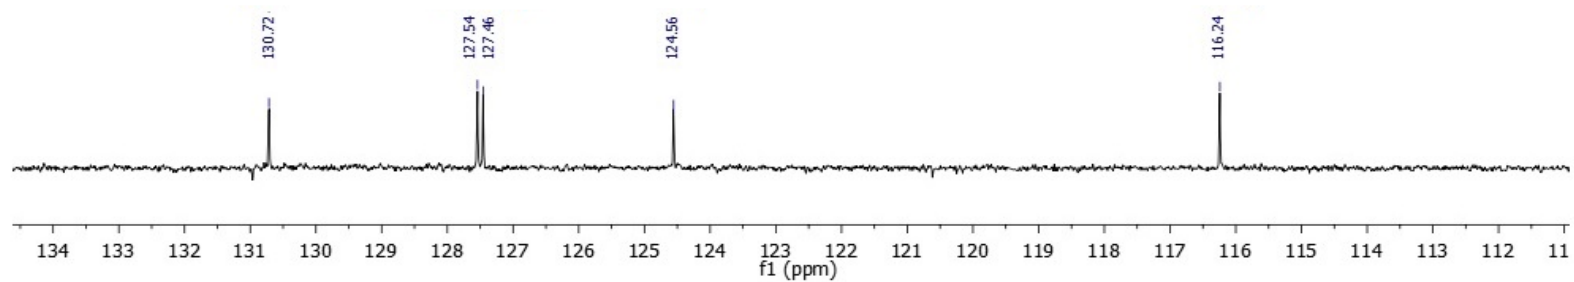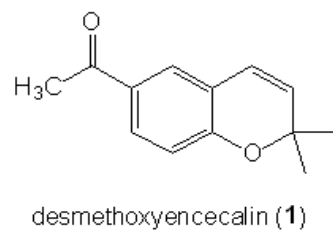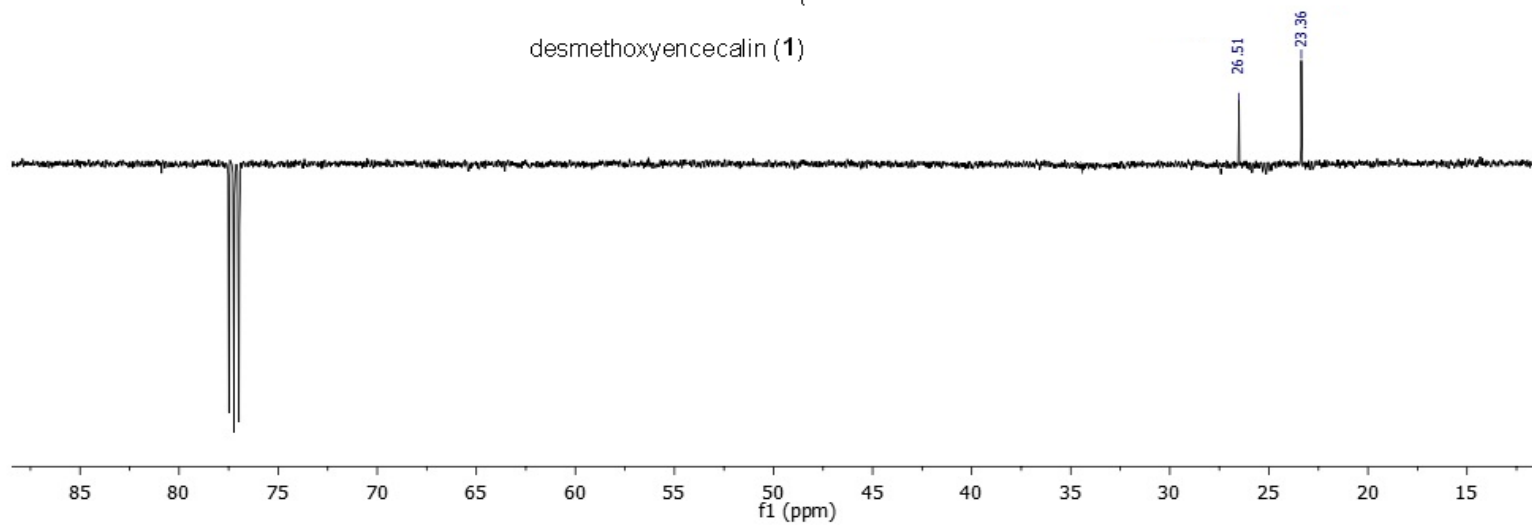

**Figure S2.** <sup>13</sup>C-DEPT-NMR spectrum (50 MHz, CDCl<sub>3</sub>) of desmethoxyencecalin (1).

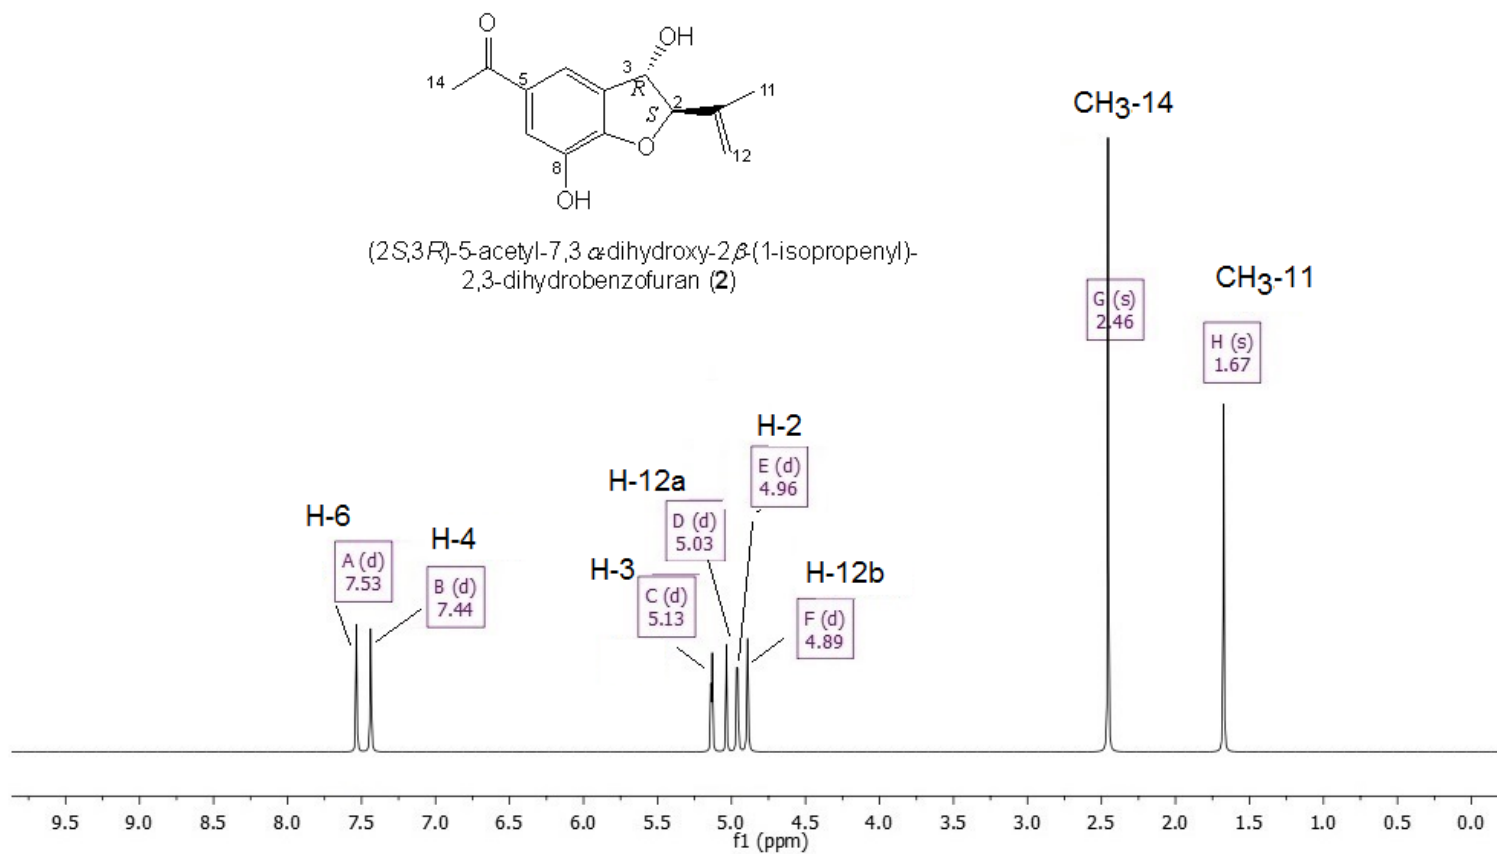

**Figure S3.** <sup>1</sup>H-NMR spectrum (200 MHz, CDCl<sub>3</sub>: CD<sub>3</sub>OD) of (2*S*,3*R*)-5-acetyl-7,3 $\alpha$ -dihydroxy-2 $\beta$ -(1-isopropenyl)-2,3-dihydrobenzofuran (**2**).

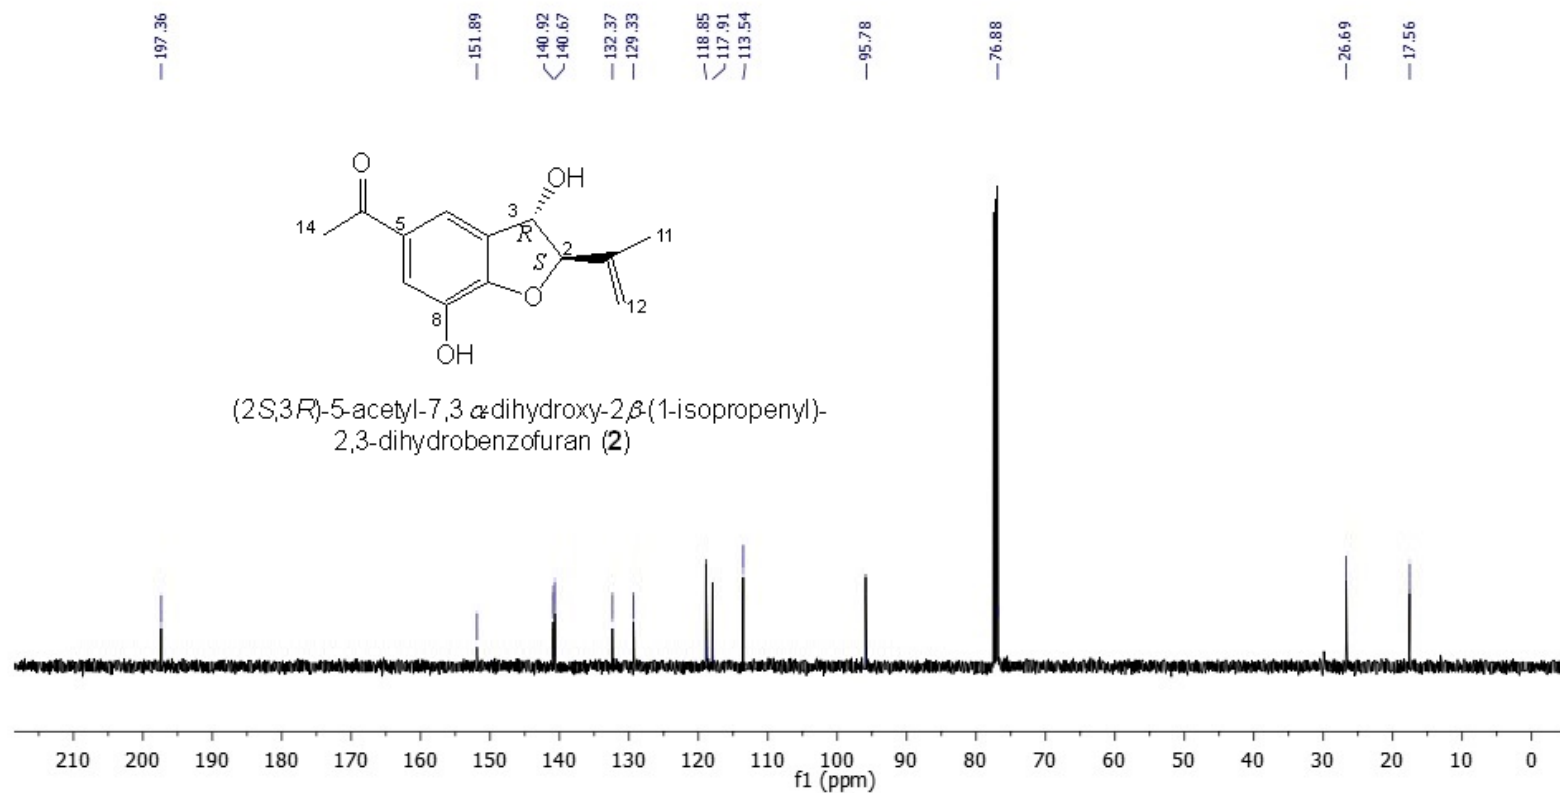

**Figure S4.** <sup>13</sup>C-NMR spectrum (50 MHz, CDCl<sub>3</sub>: CD<sub>3</sub>OD) of (2*S*,3*R*)-5-acetyl-7,3 $\alpha$ -dihydroxy-2 $\beta$ -(1-isopropenyl)-2,3-dihydrobenzofuran (**2**).

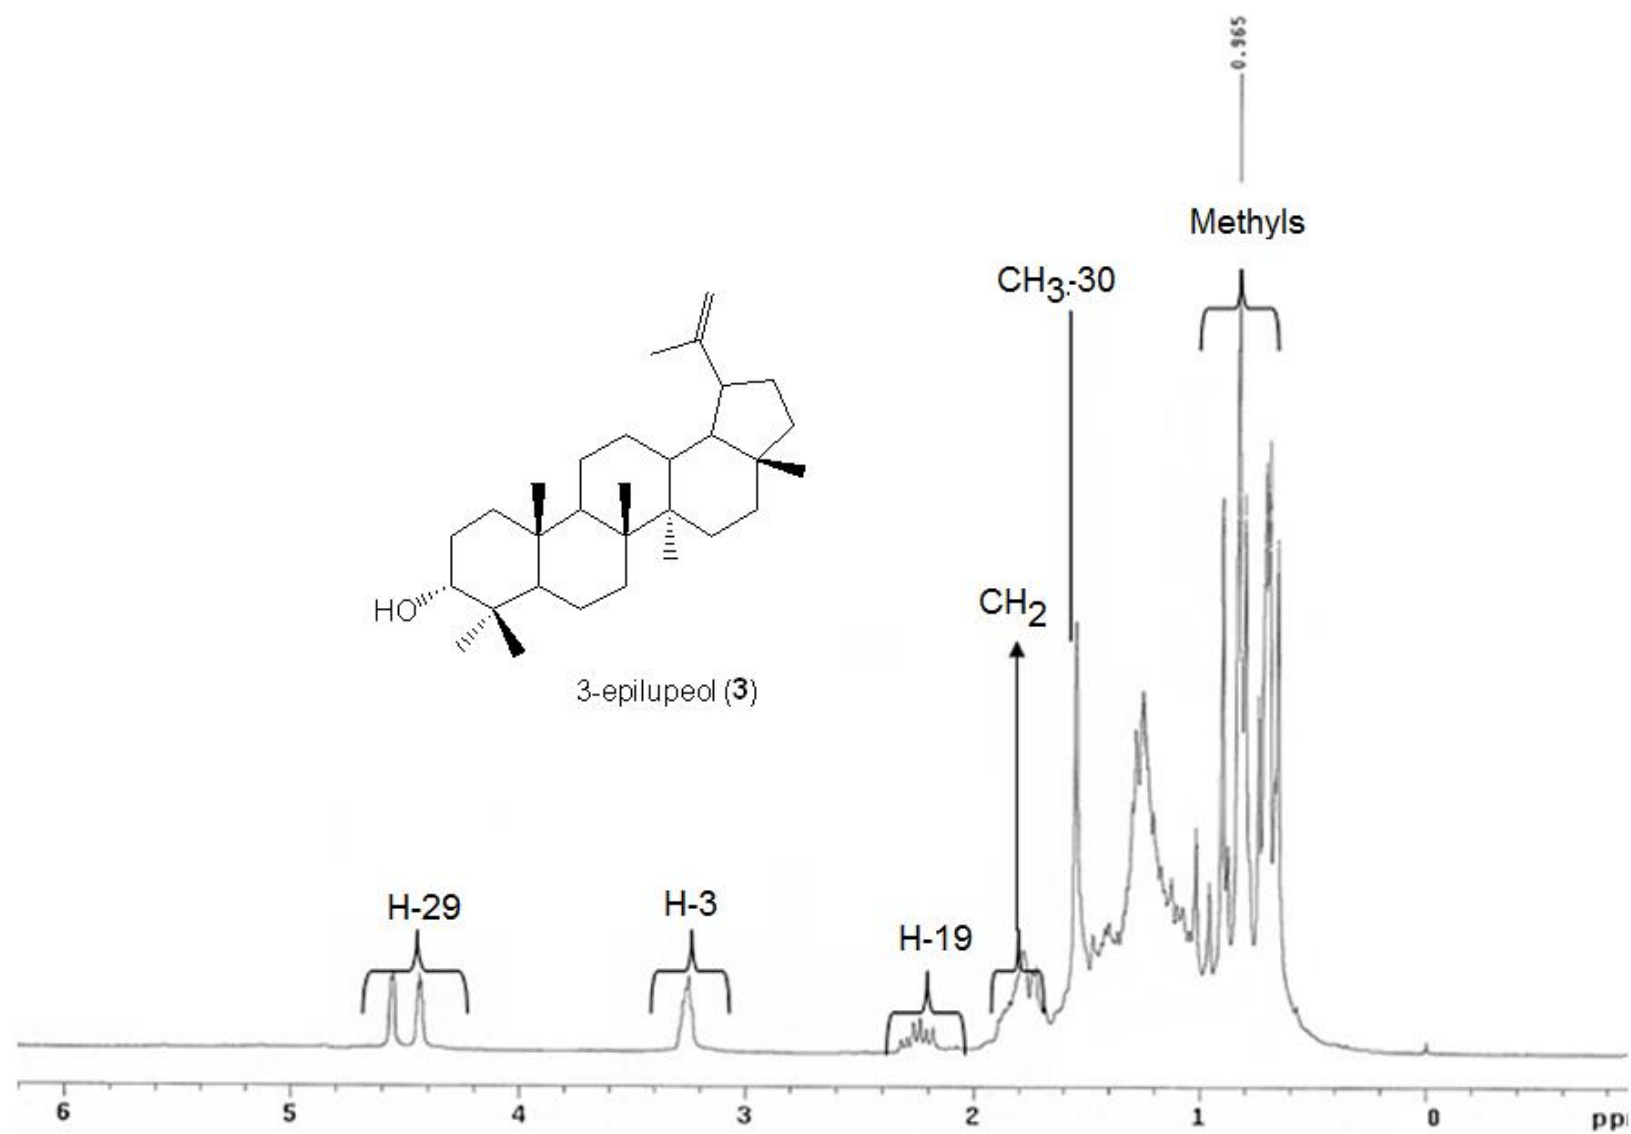

Figure S5.  $^1\text{H}$ -NMR spectrum (200 MHz,  $\text{CDCl}_3$ ) of 3-Epilupeol (3).

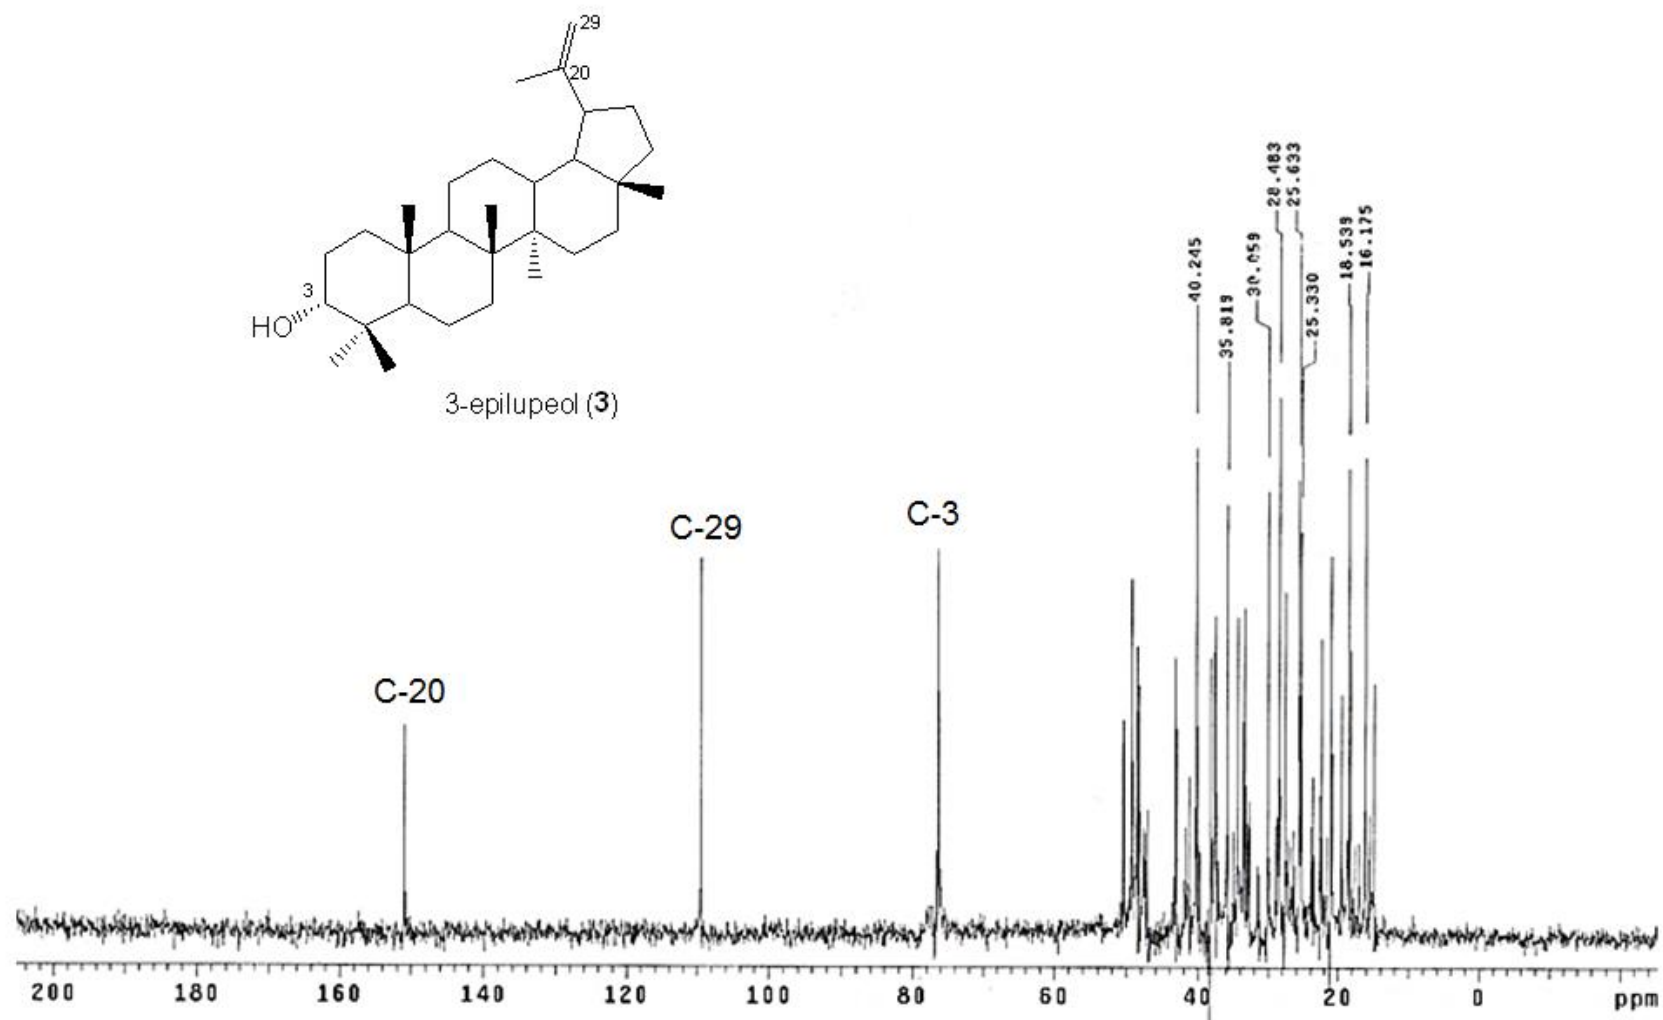

Figure S6.  $^{13}\text{C}$ -NMR spectrum (50 MHz,  $\text{CDCl}_3$ ) of 3-Epilupeol (3).

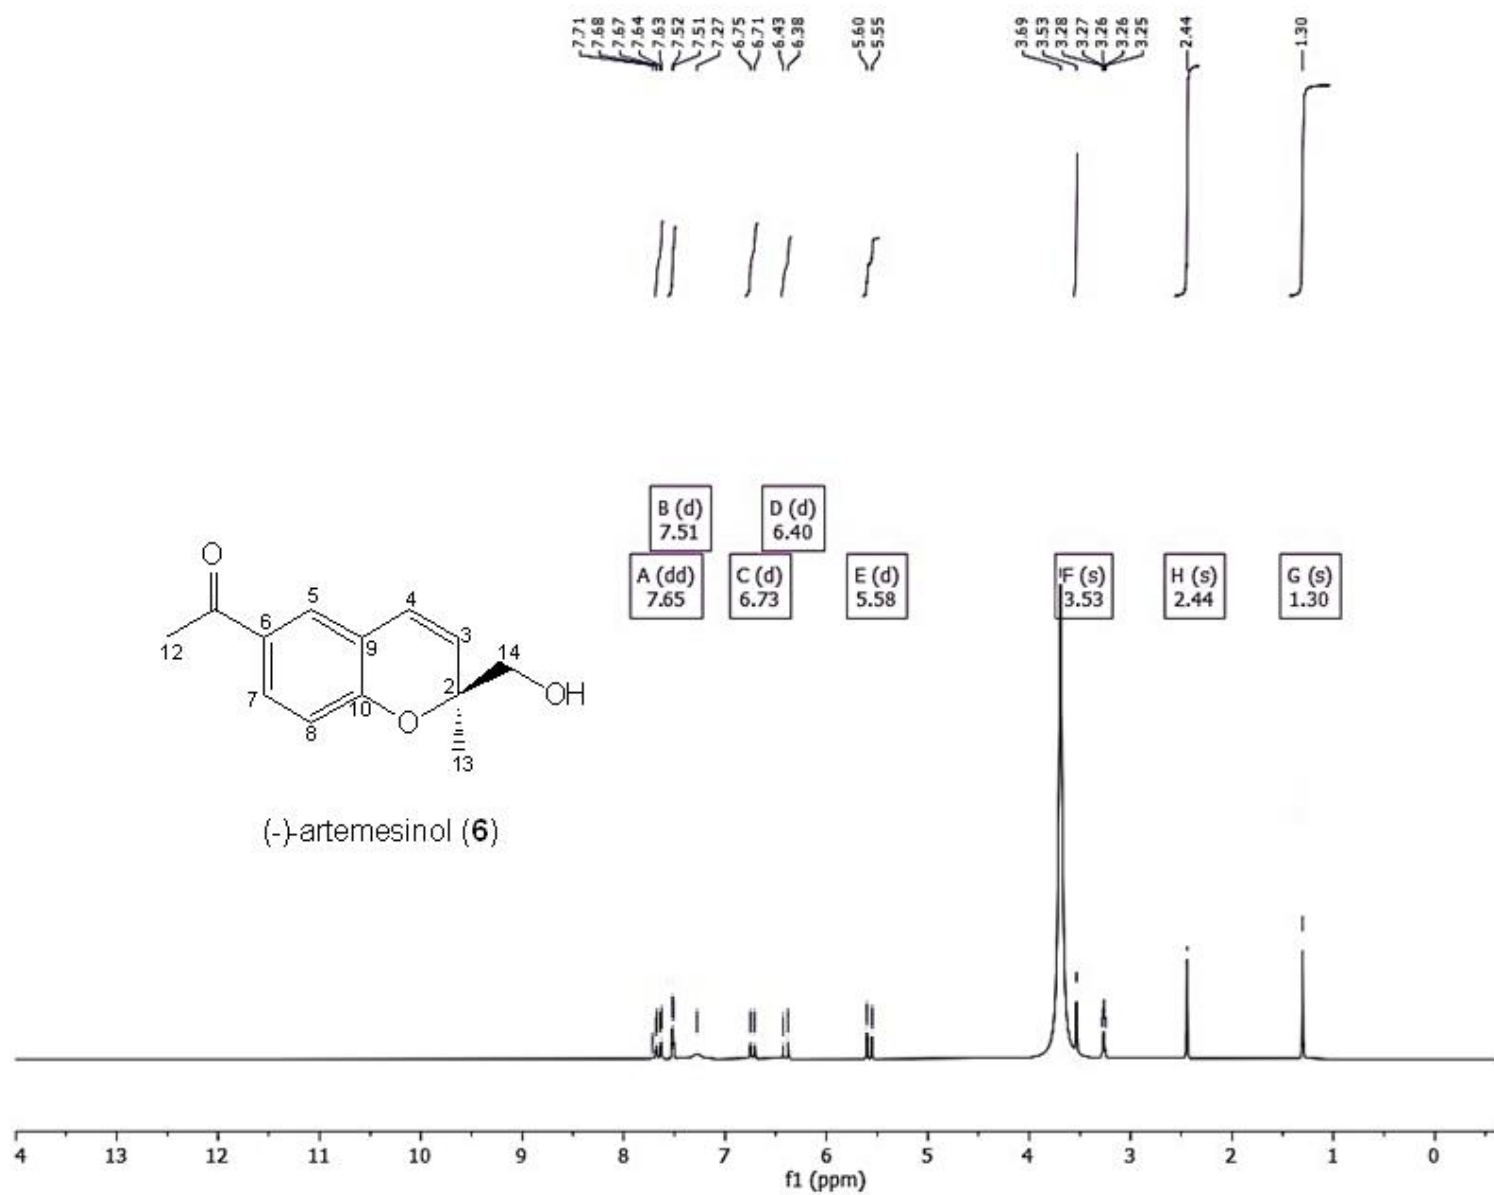

Figure S7. <sup>1</sup>H NMR (200 MHz, CDCl<sub>3</sub>:CD<sub>3</sub>OD) of (-)-Artemesinol (6).

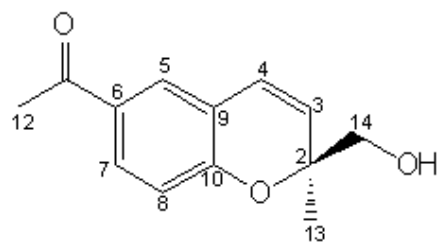

(-)-artemesinol (**6**)

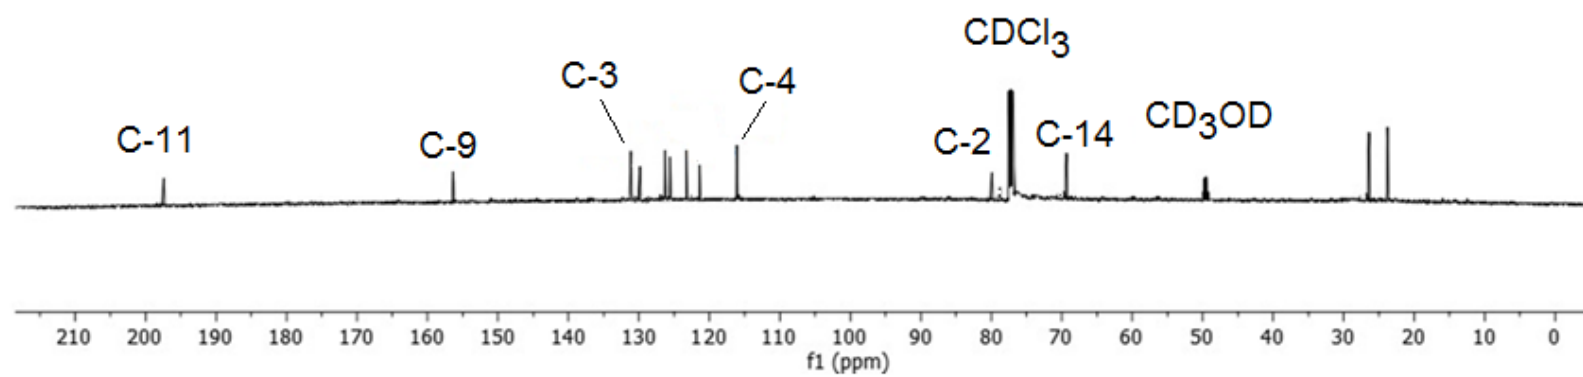

**Figure S8.**  $^{13}\text{C}$  NMR (50 MHz,  $\text{CDCl}_3:\text{CD}_3\text{OD}$ ) of (-)-Artemesinol (**6**).



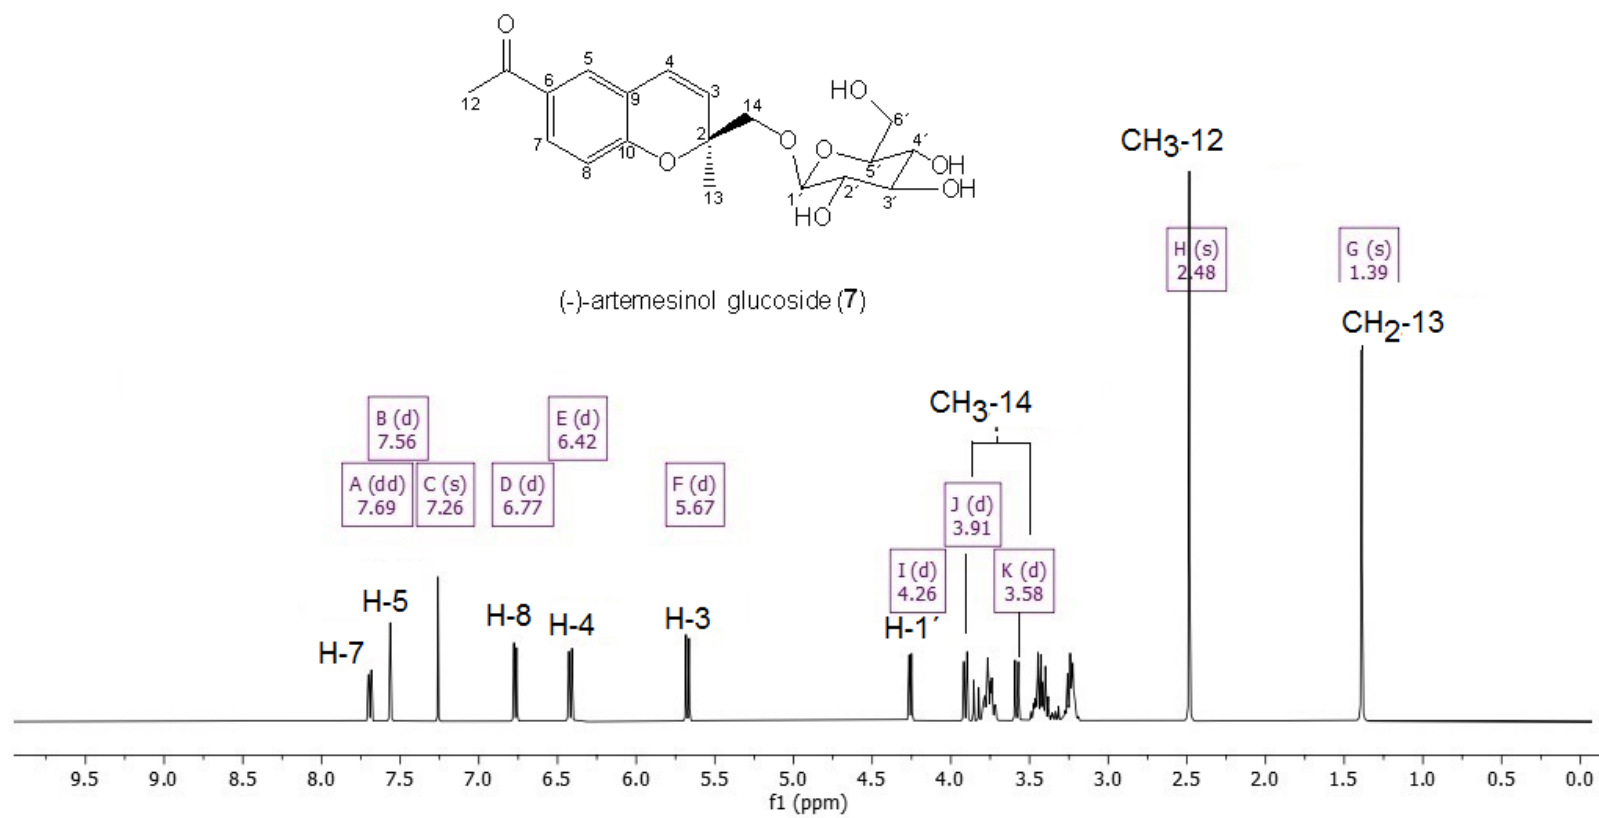

Figure S9. <sup>1</sup>H-NMR spectrum (500 MHz, CDCl<sub>3</sub>:CD<sub>3</sub>OD) of (-)-Artemesinol glucoside (7).

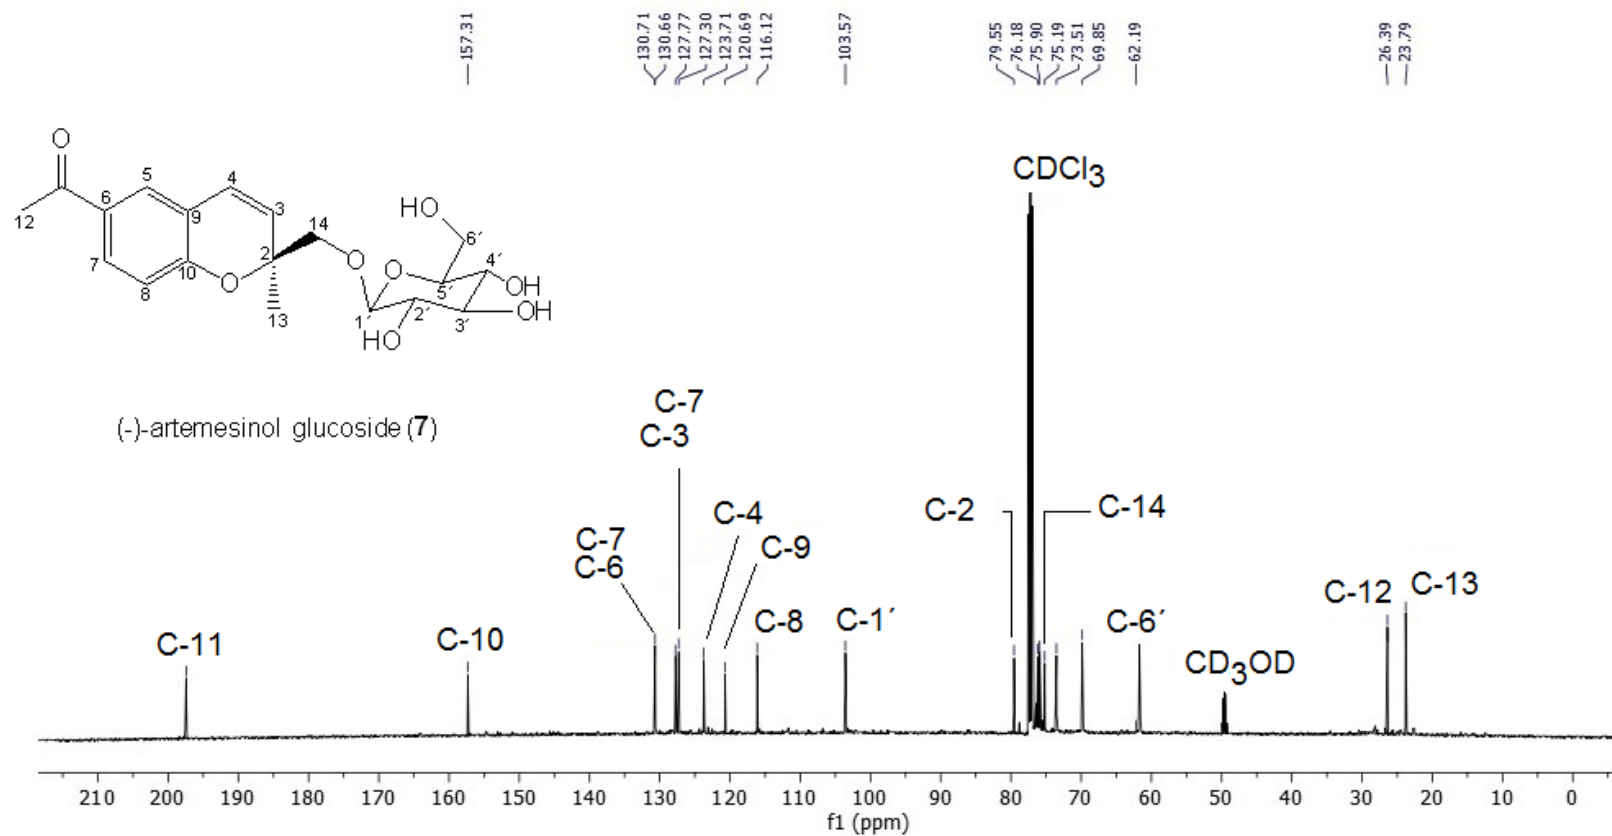

**Figure S10.** <sup>13</sup>C-NMR spectrum (125 MHz, CDCl<sub>3</sub>: CD<sub>3</sub>OD) of (-)-Artemesinol glucoside (7).

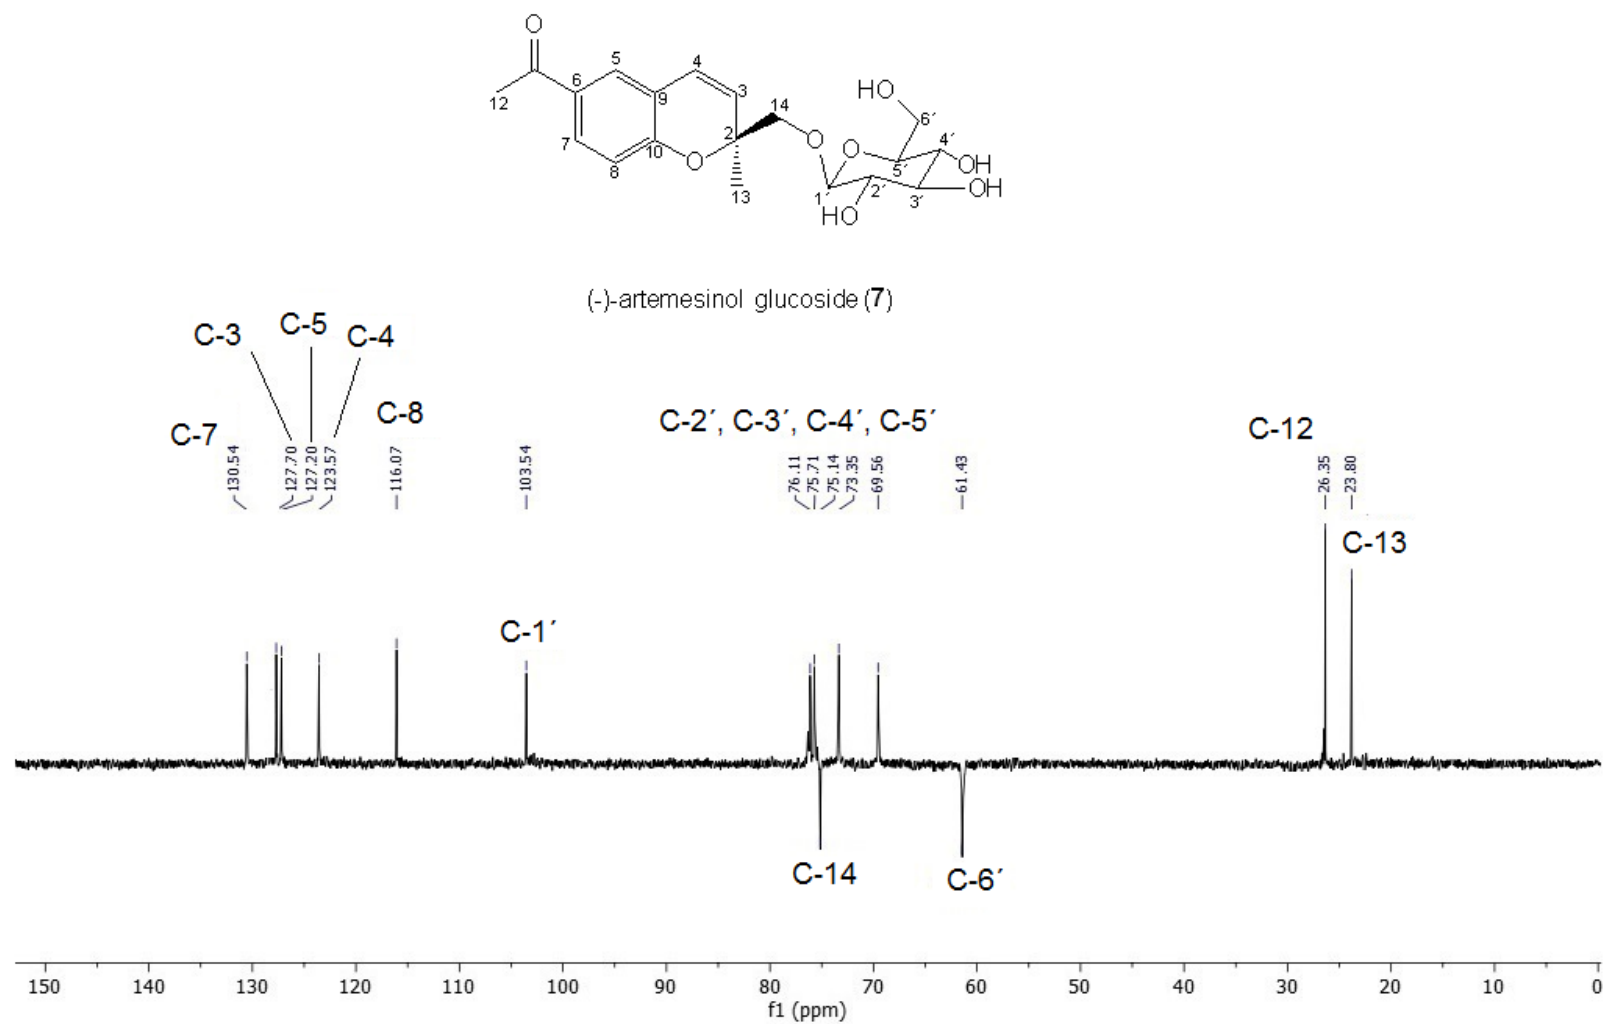

Figure S11. DEPT spectrum (125 MHz, CDCl<sub>3</sub>: CD<sub>3</sub>OD) of (-)-Artemesinol glucoside (**7**).

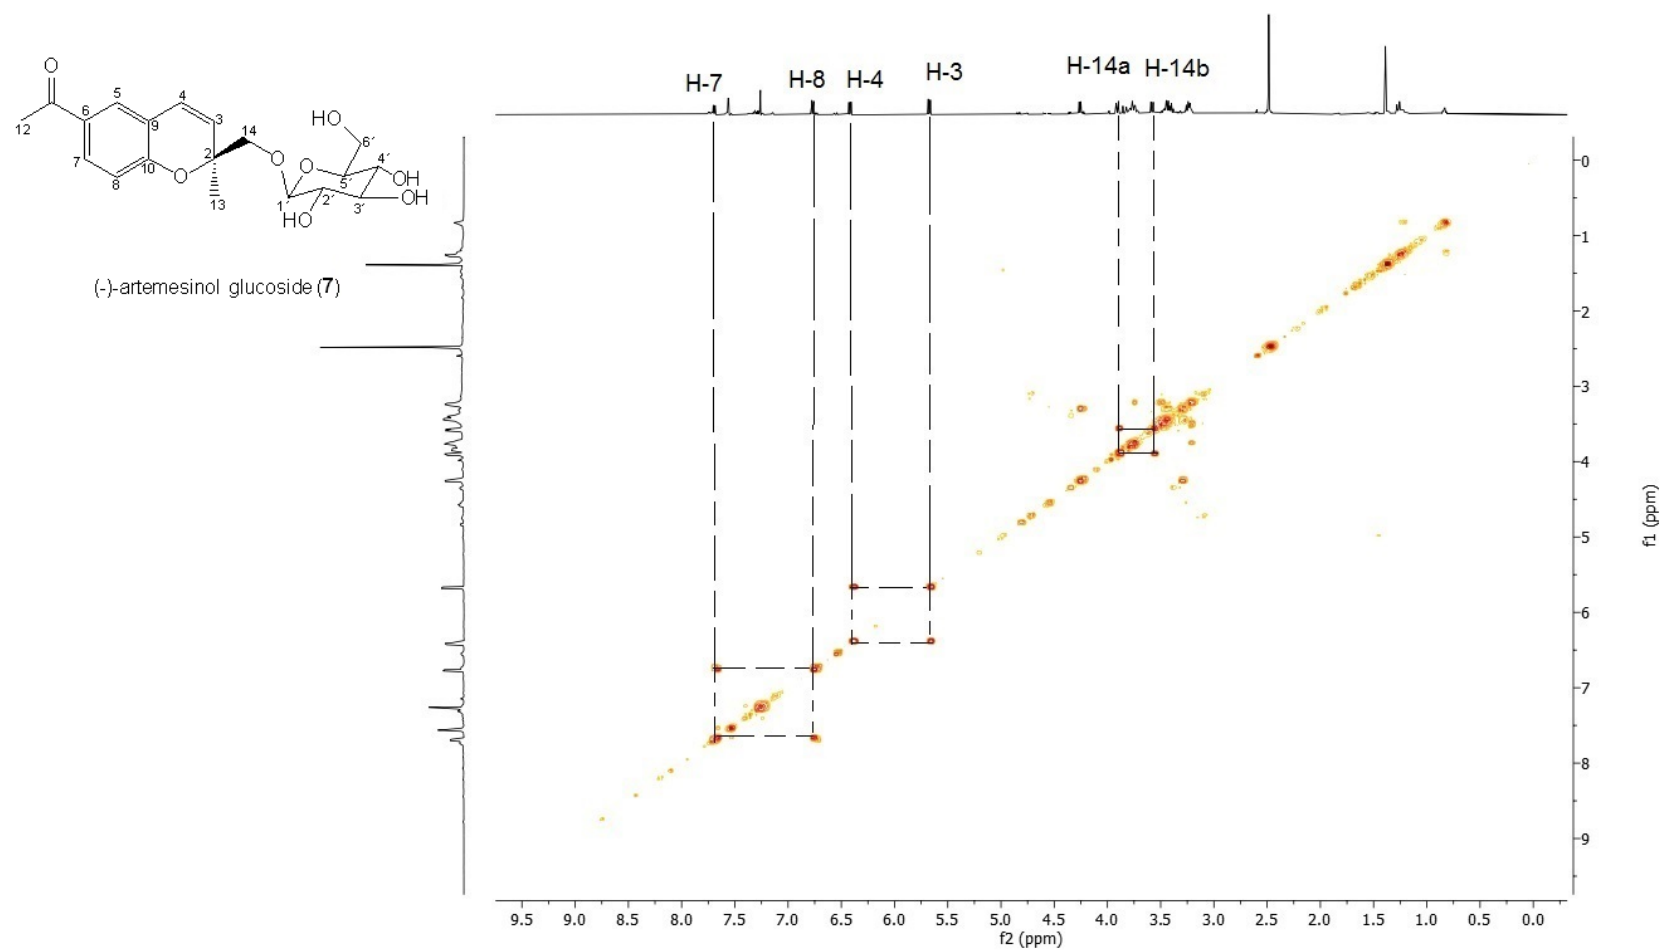

**Figure S12.** COSY spectrum (500 MHz, CDCl<sub>3</sub>: CD<sub>3</sub>OD) of (-)-Artemesinol glucoside (7).

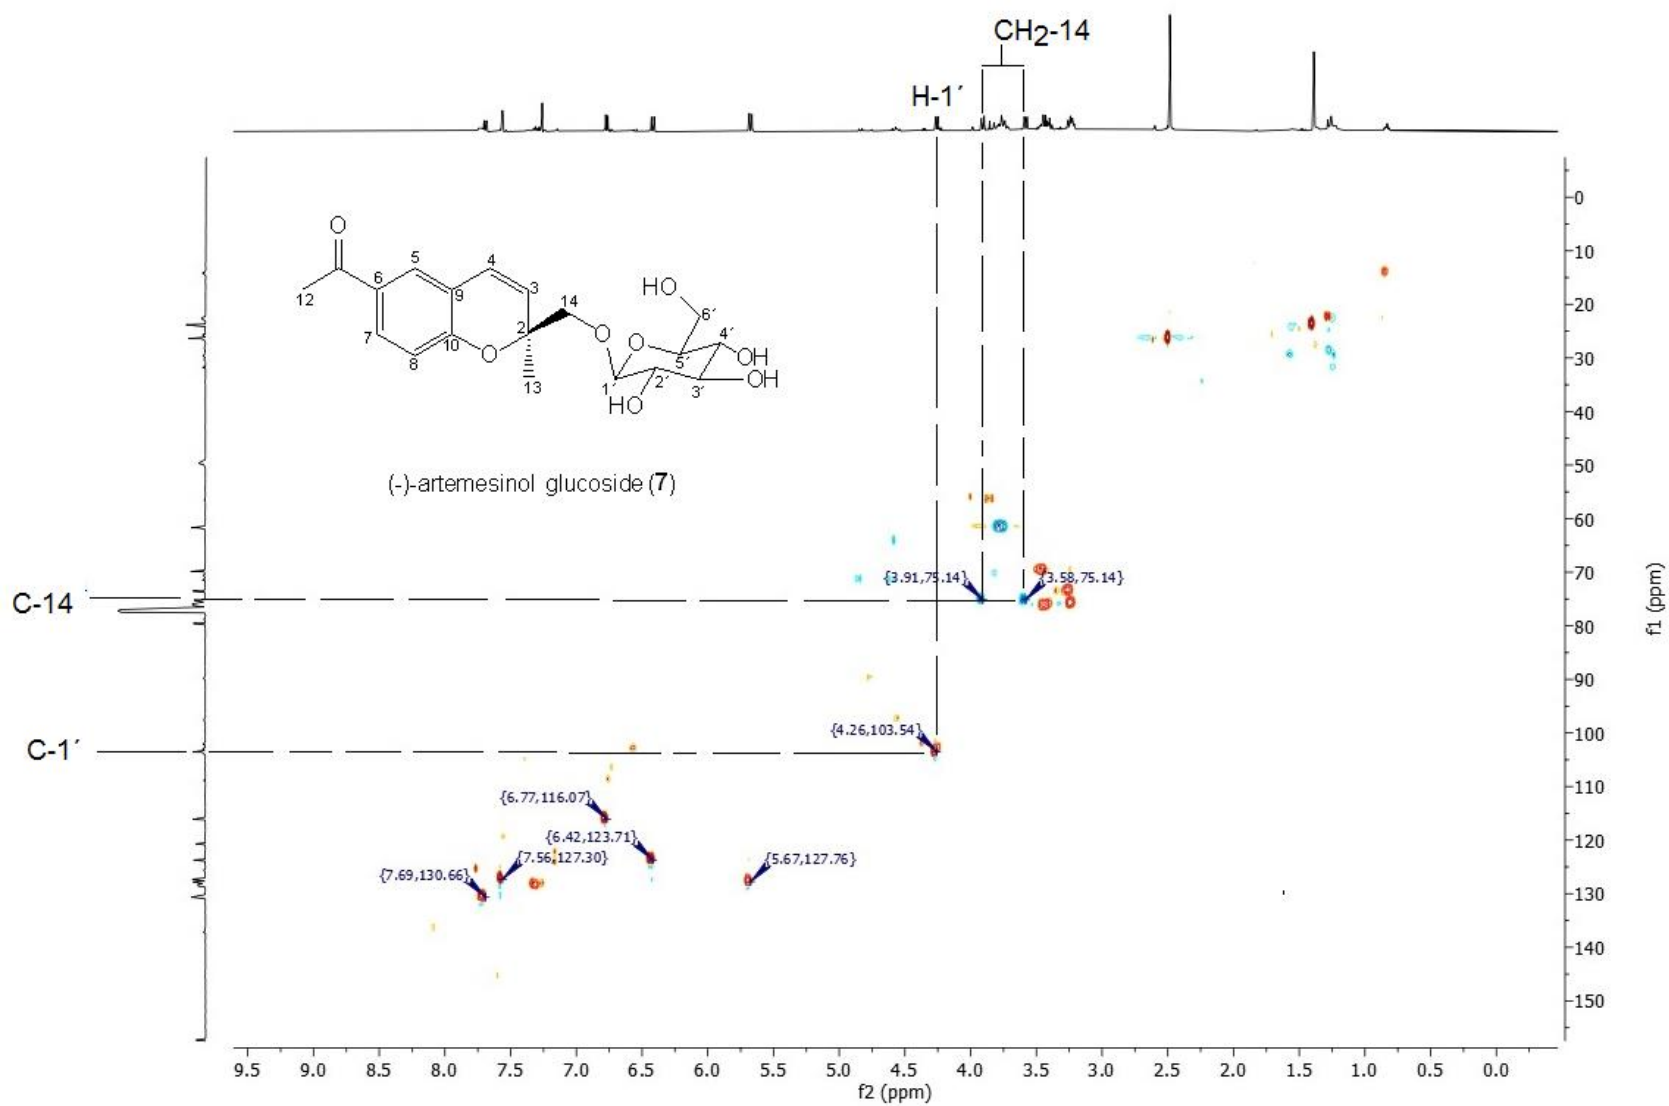

**Figure S13.** HSQC spectrum (500 MHz, CDCl<sub>3</sub>: CD<sub>3</sub>OD) of (-)-Artemesinol glucoside (7).

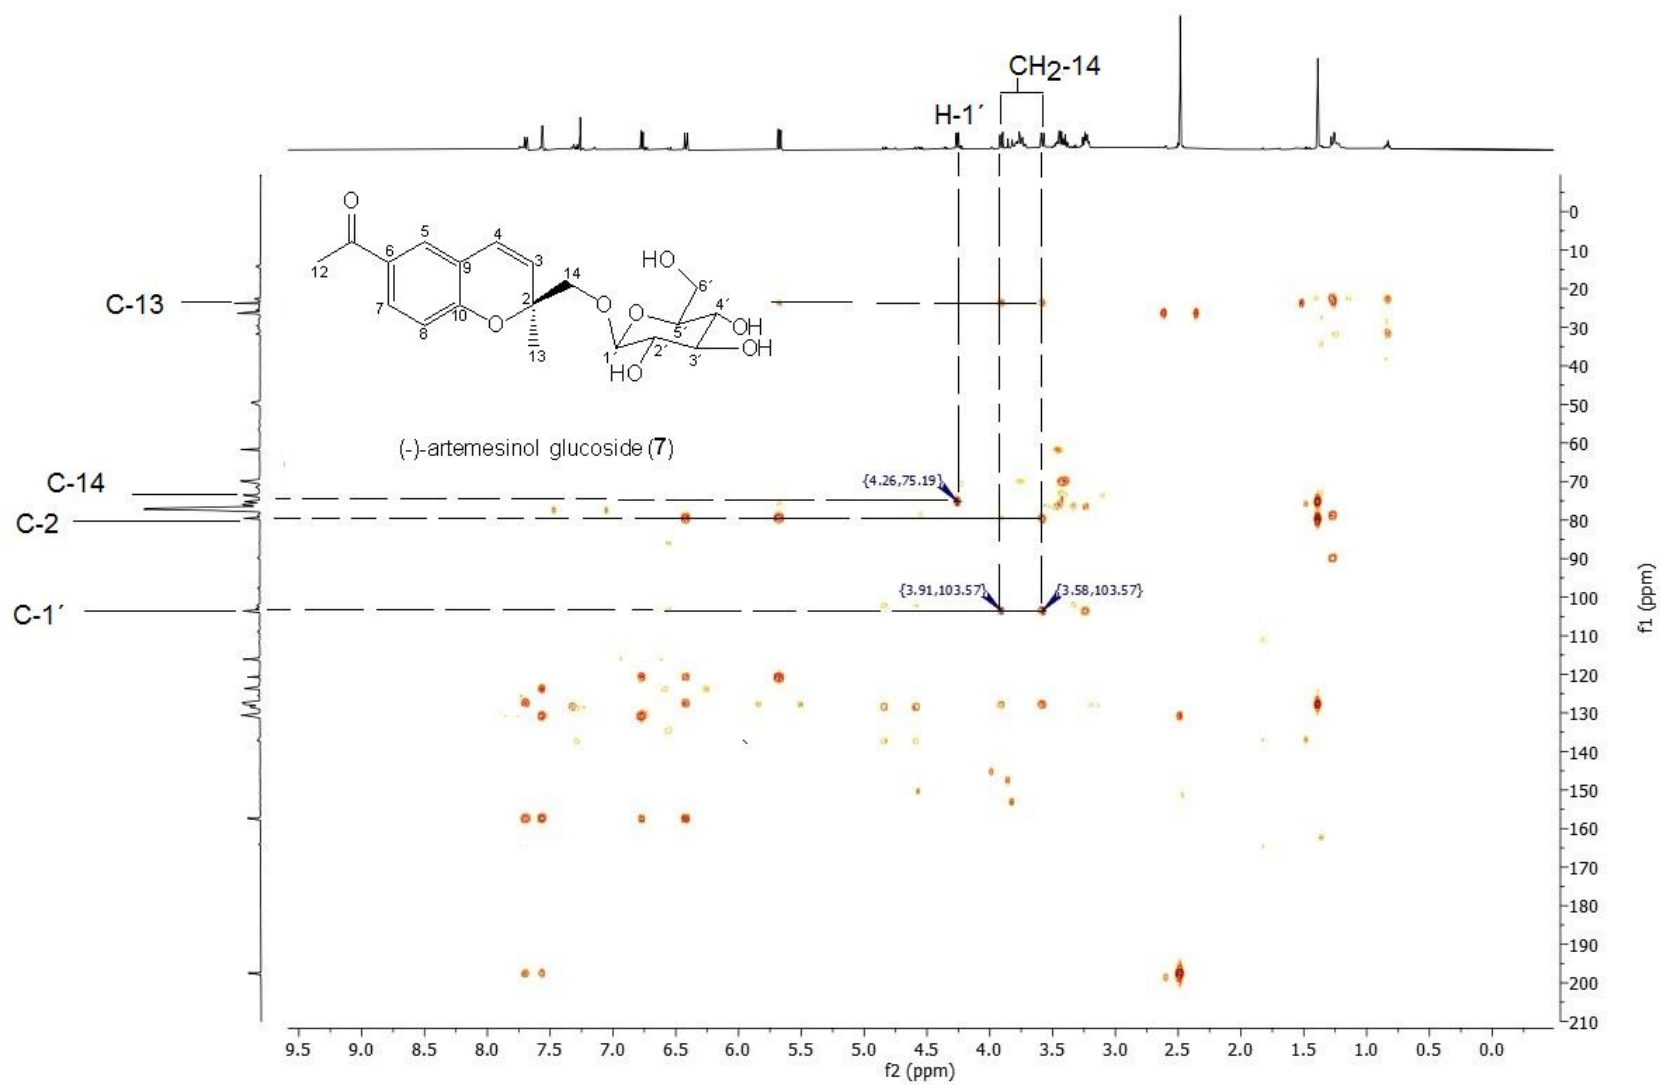

**Figure S14.** HMBC spectrum (500 MHz, CDCl<sub>3</sub>: CD<sub>3</sub>OD) of (-)-Artemesinol glucoside (7).

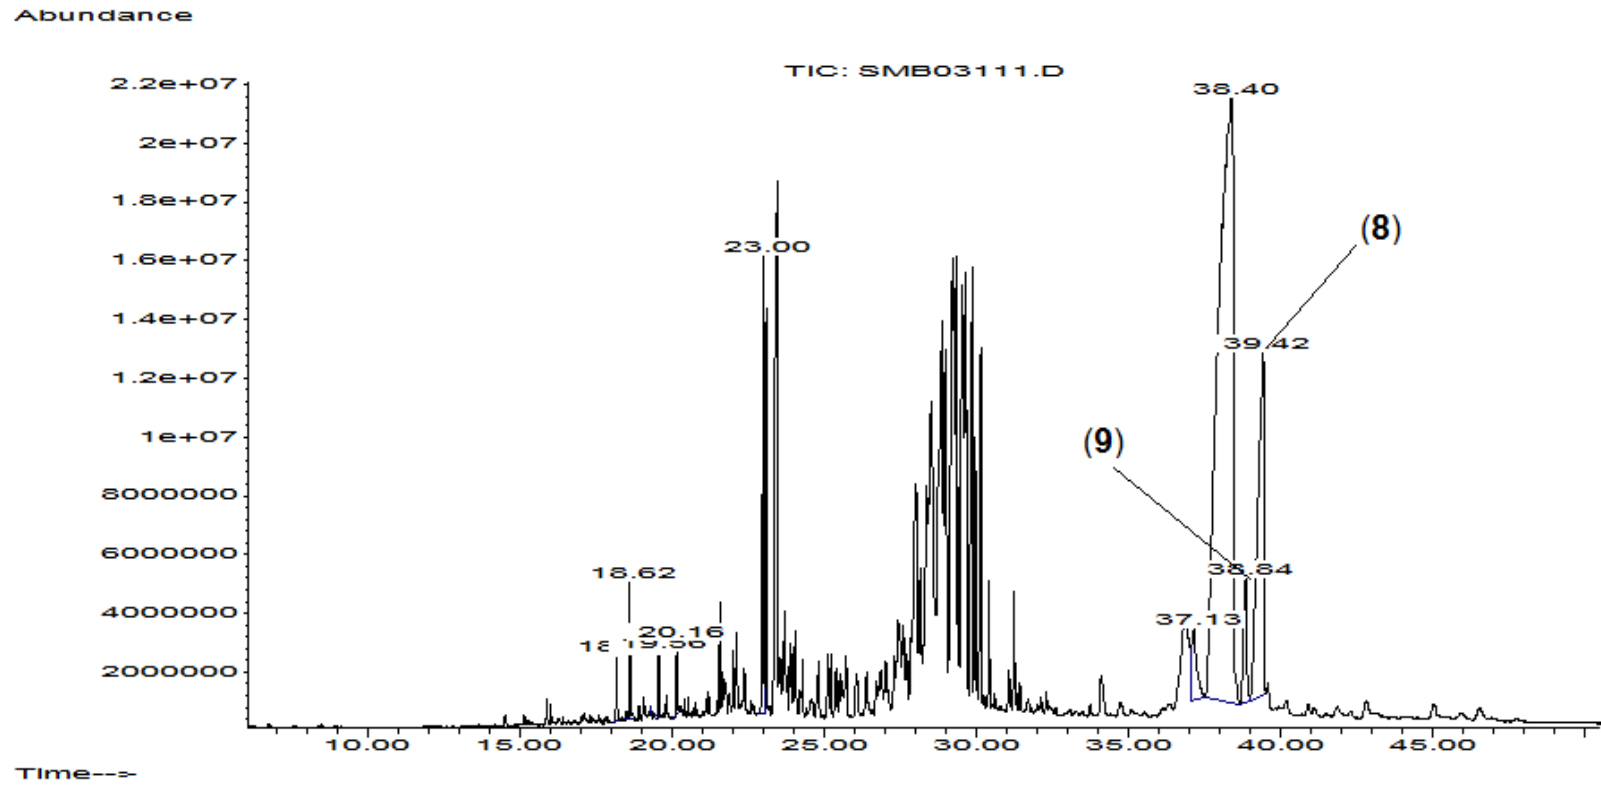

Figure S15a. GC-MS chromatogram of cell suspension culture extract with compounds 8 and 9.

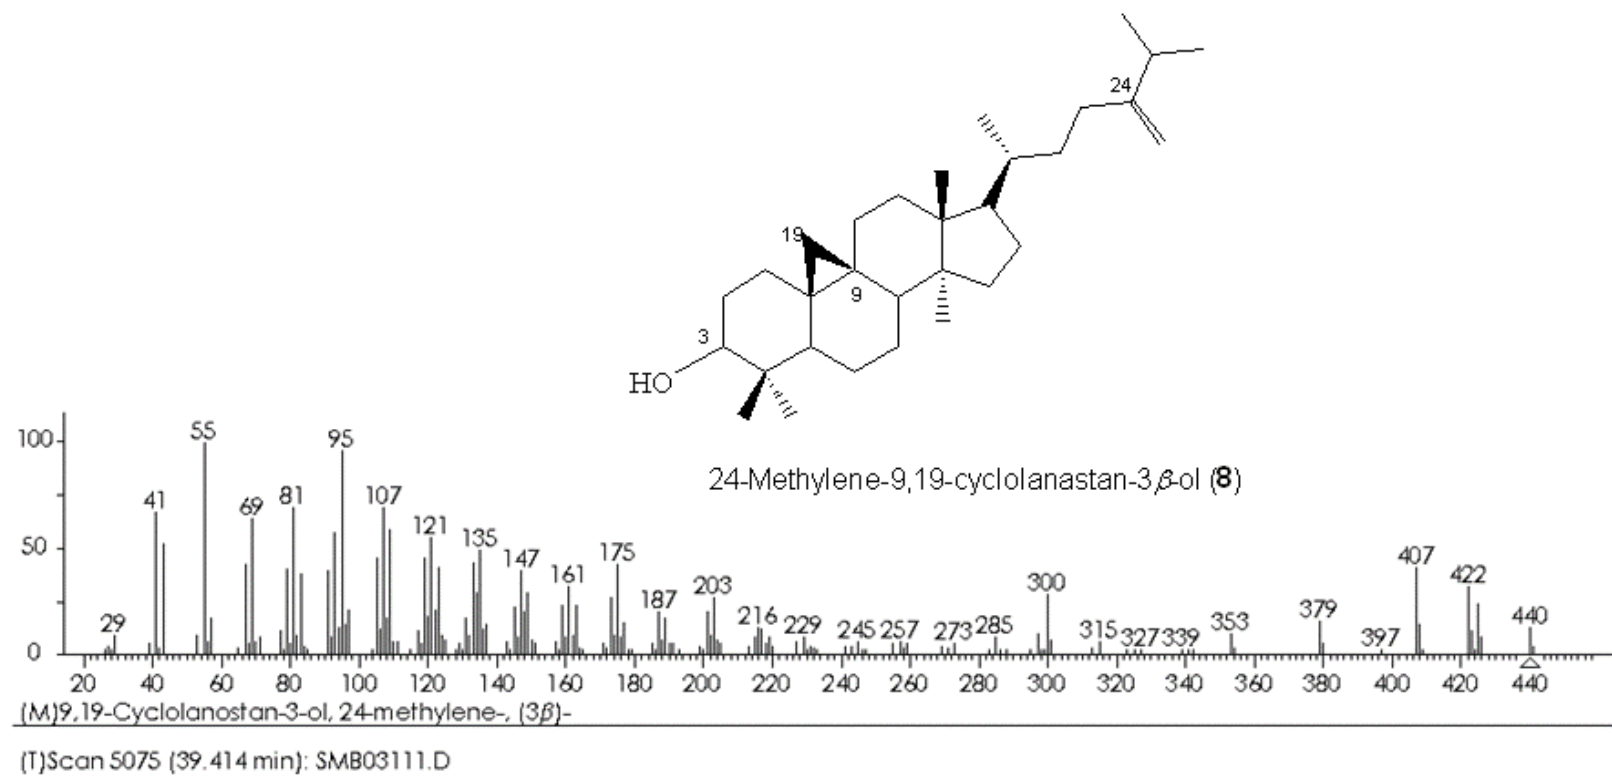

**Figure S15b.** Mass spectrum of compound 8.



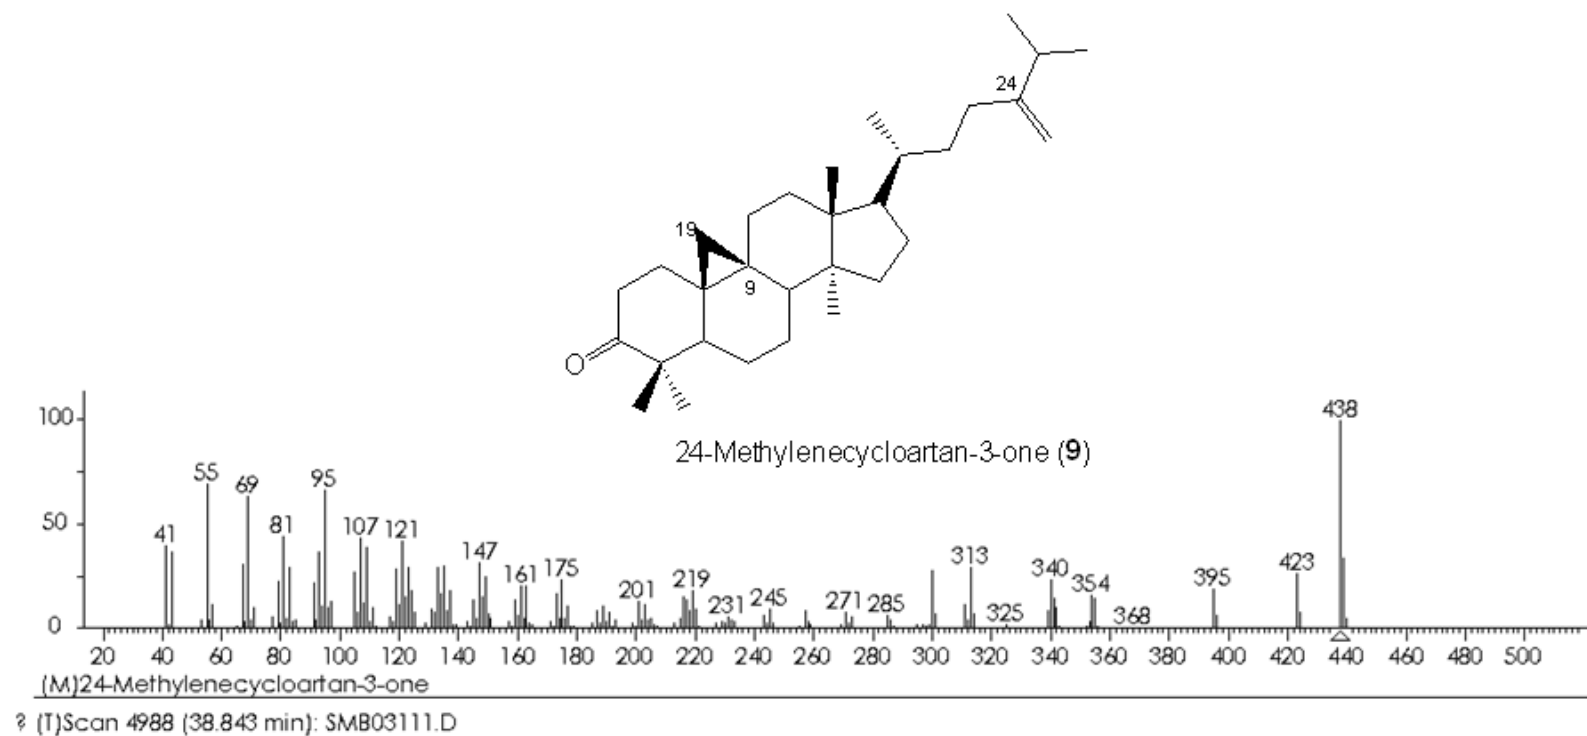

Figure S15c. Mass spectrum of compound **9**.

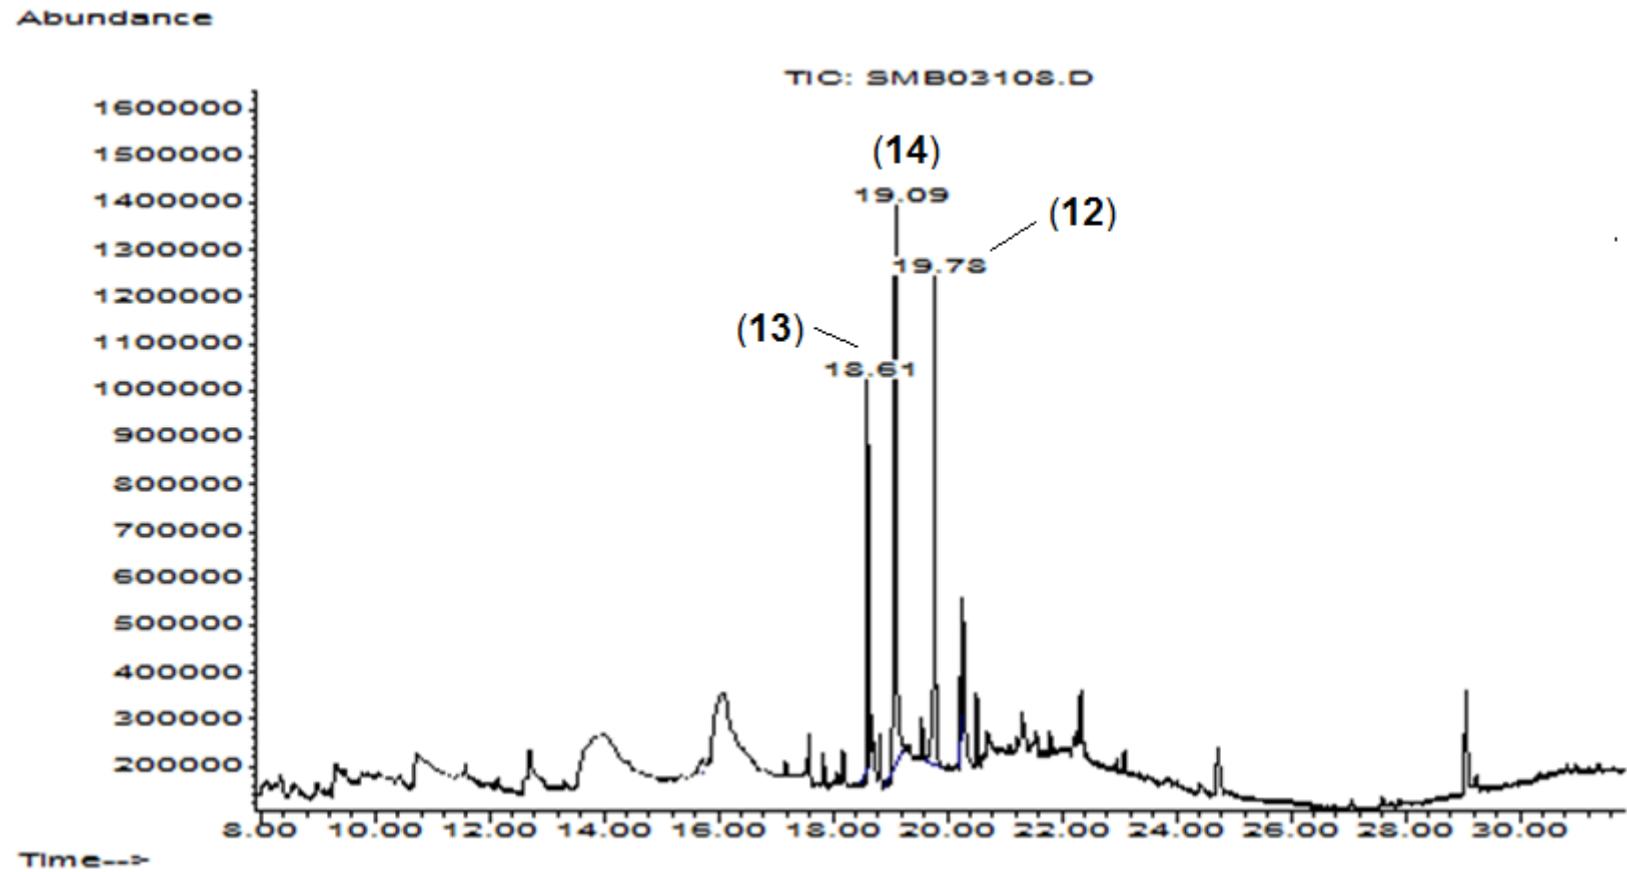

Figure S16a. GC-MS chromatogram of cell suspension culture extract with compounds 12–14.

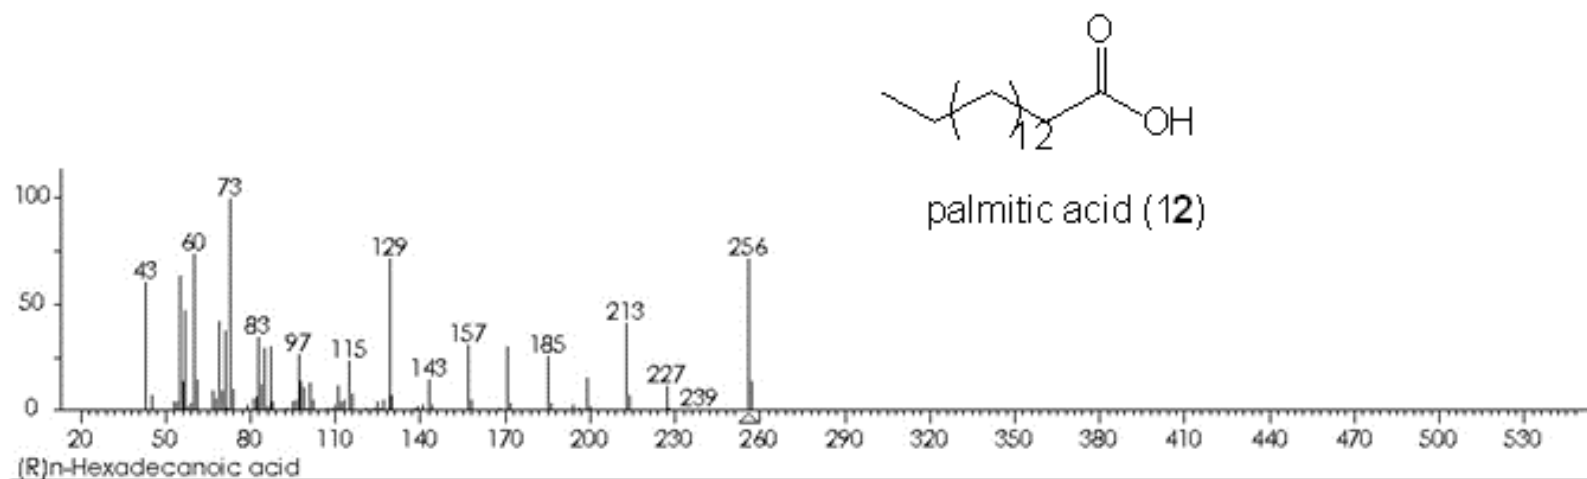

Figure S16b. Mass spectrum of compound 12.

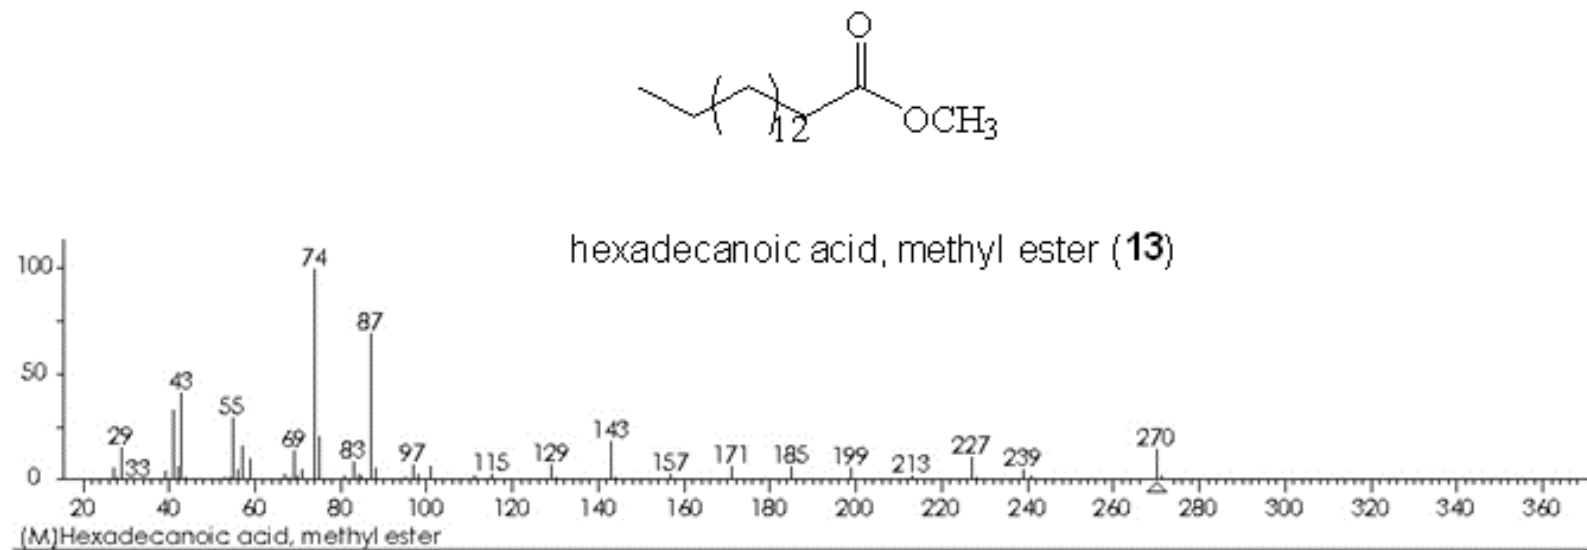

Figure S16c. Mass spectrum of compound 13.

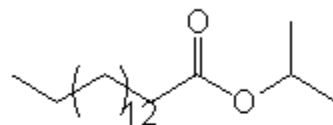

Isopropyl palmitate (**14**)

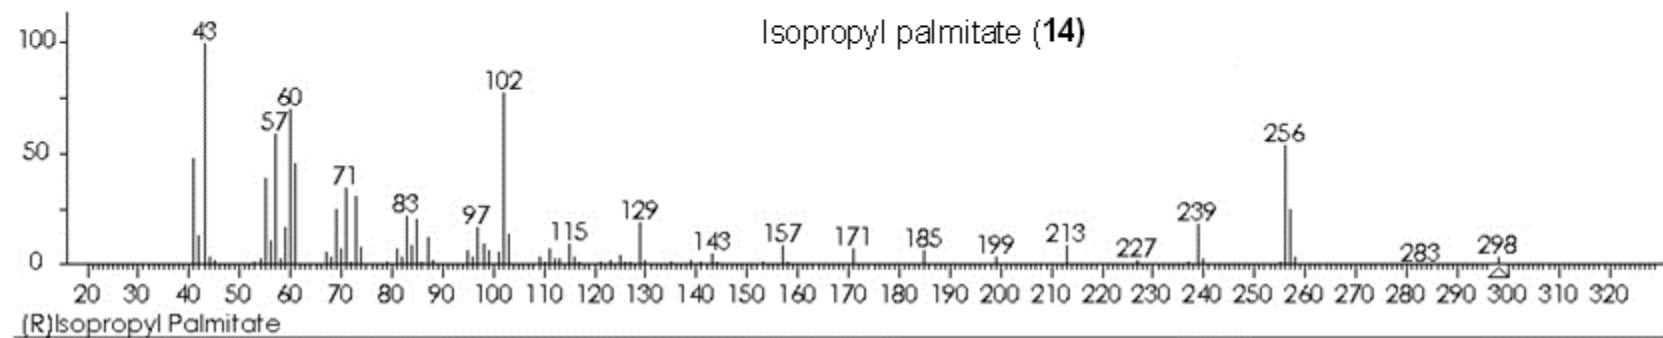

Figure S16d. Mass spectrum of compound 14.

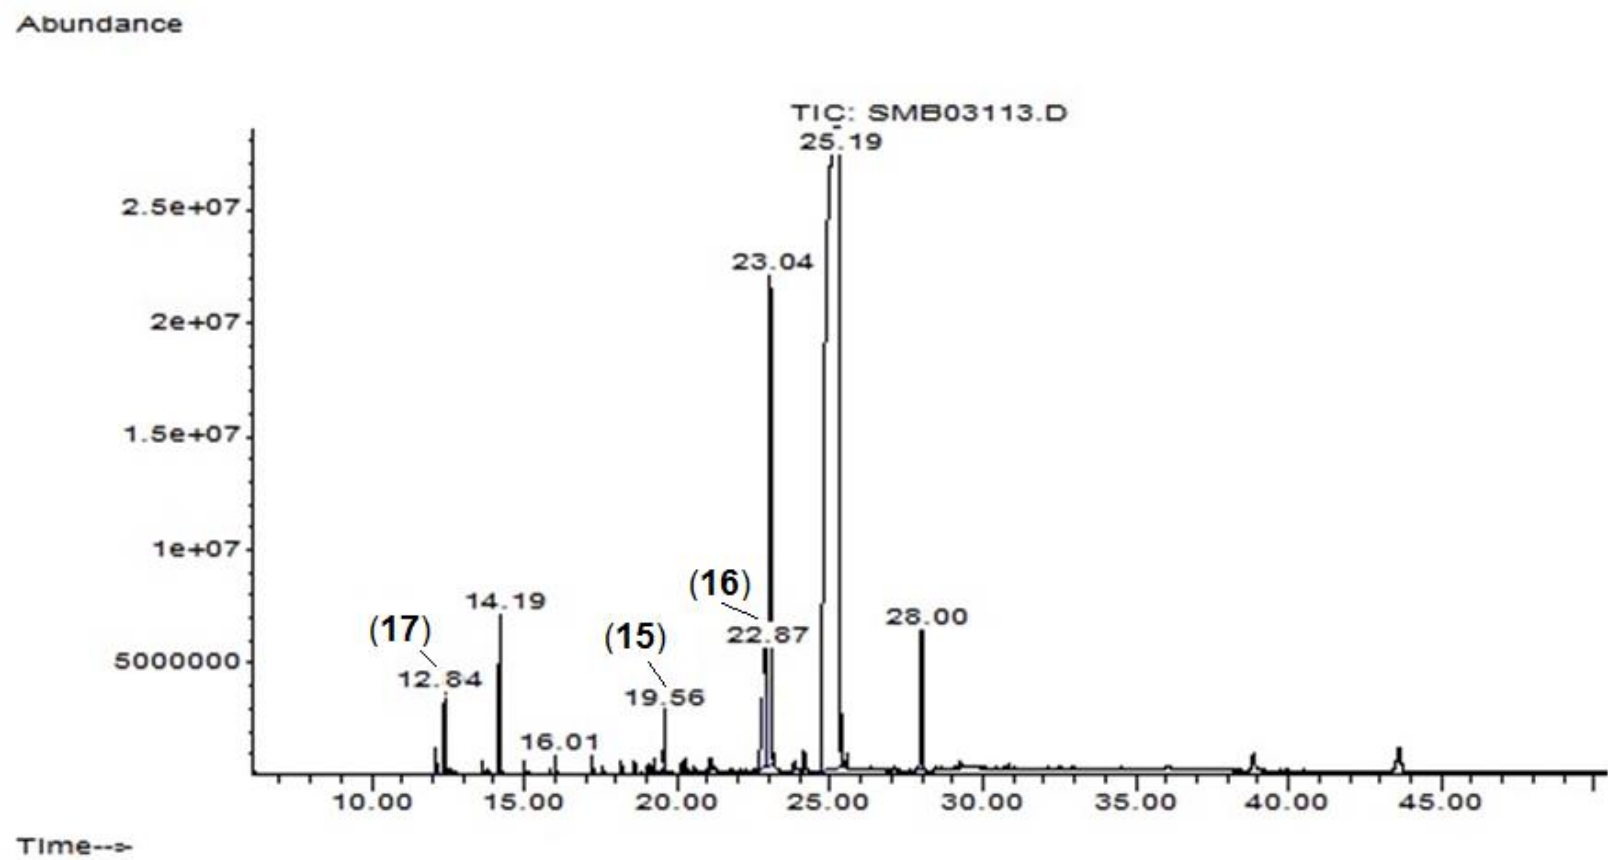

Figure S17a. GC-MS chromatogram of cell suspension culture extract with compounds 15–17.

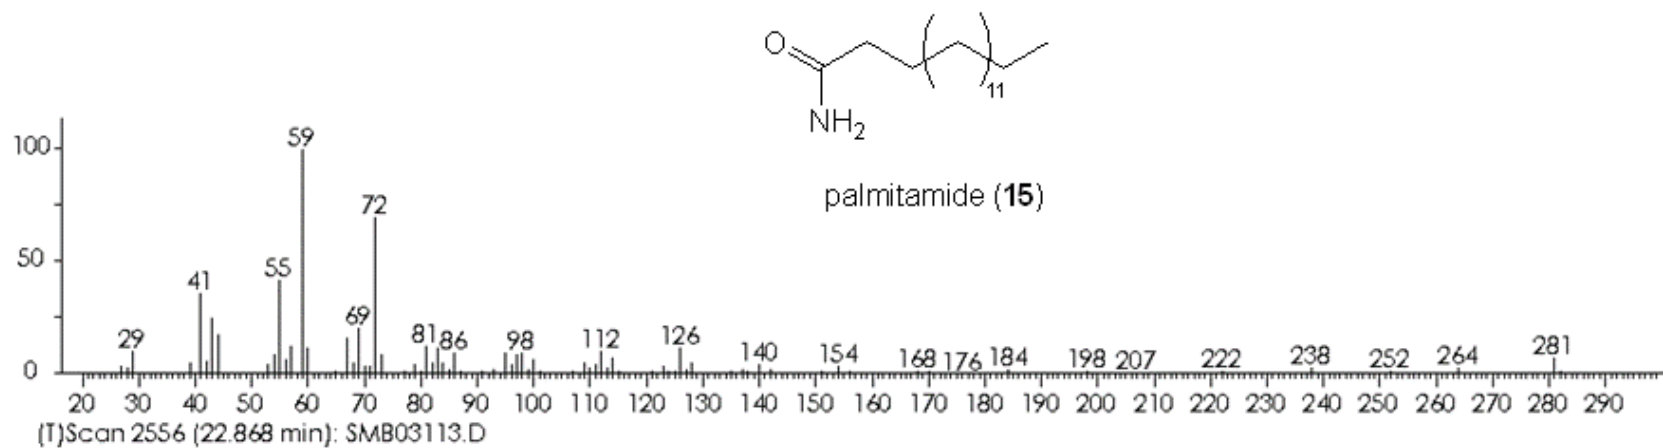

Figure S17b. Mass spectrum of compound 15.

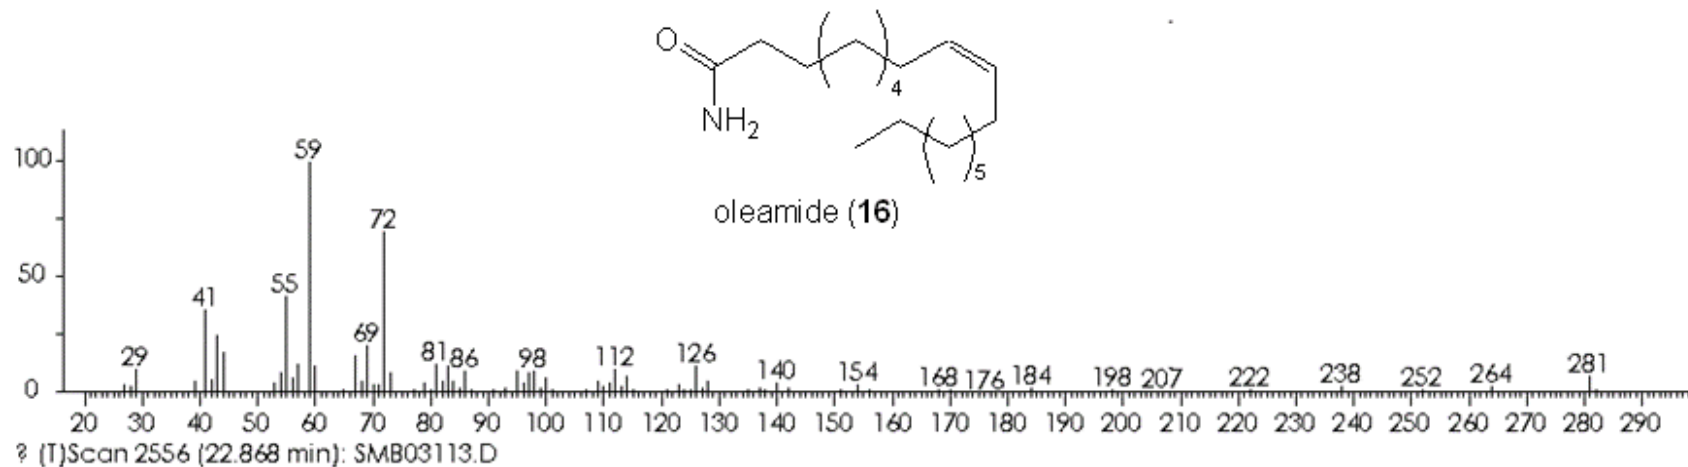

Figure S17c. Mass spectrum of compound 16.

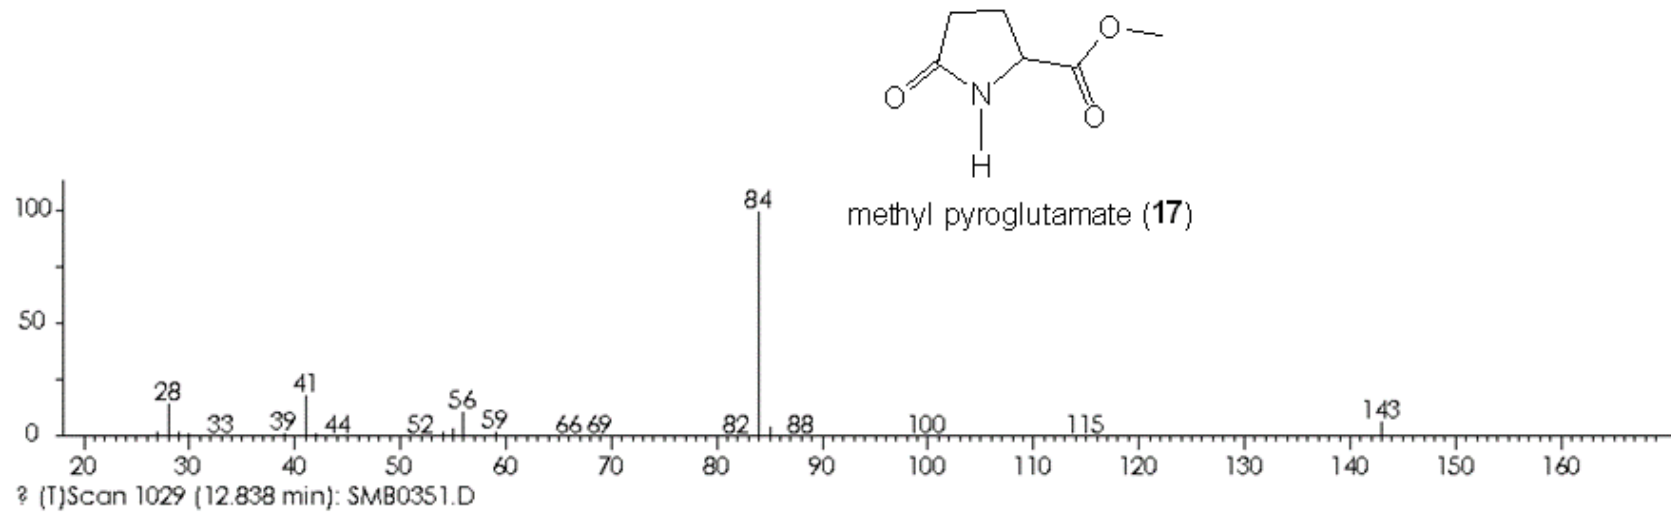

**Figure S17d.** Mass spectrum of compound 17.

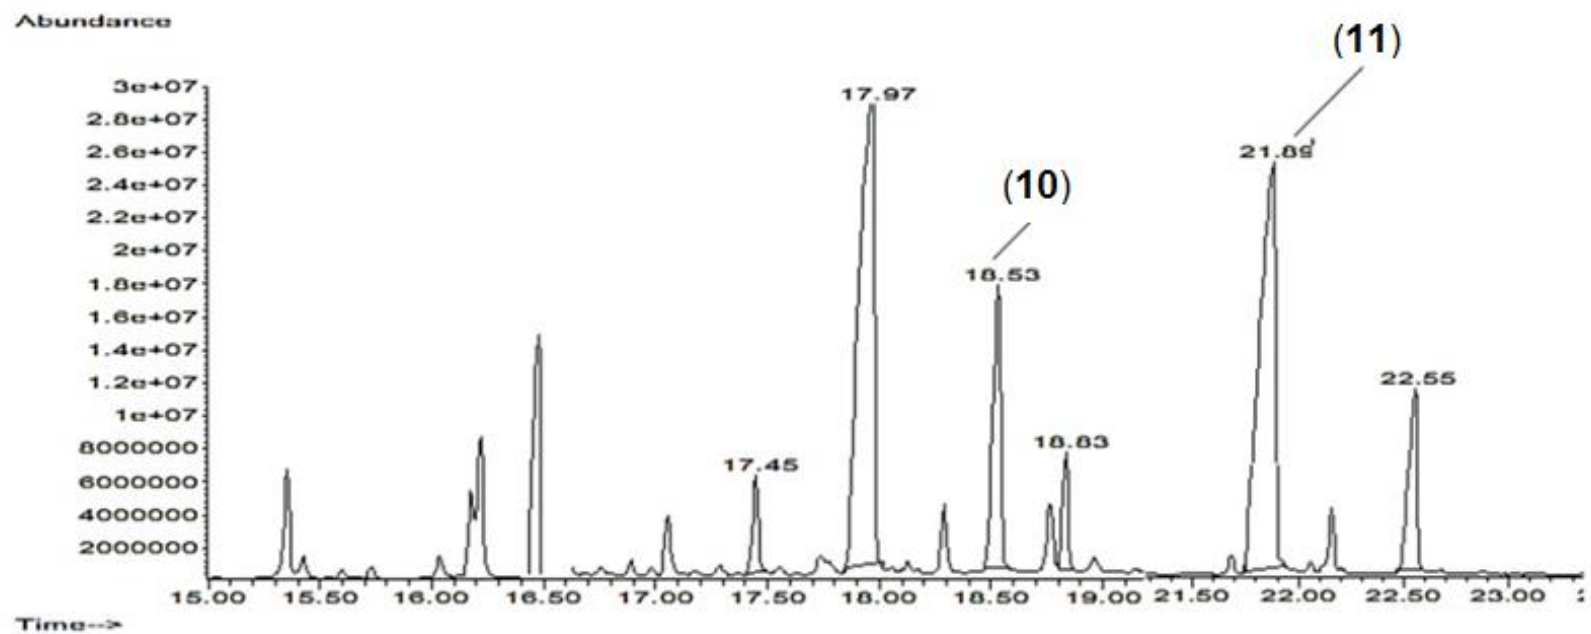

Figure S18a. GC-MS chromatogram of compounds 10–11 obtained of the ethyl acetate extract from wild plant *A. pichinchensis*.



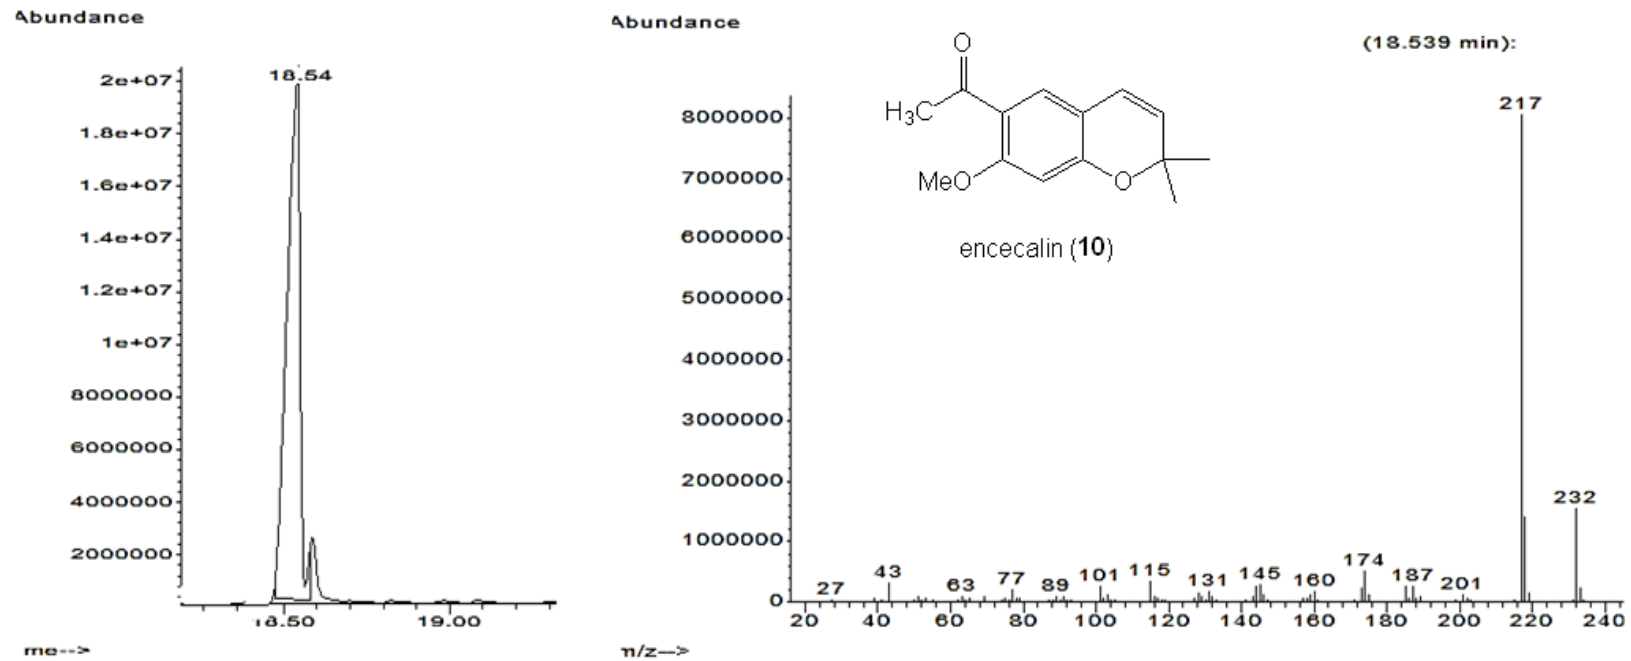

Figure S18b. GC-MS chromatograms of compound 10.

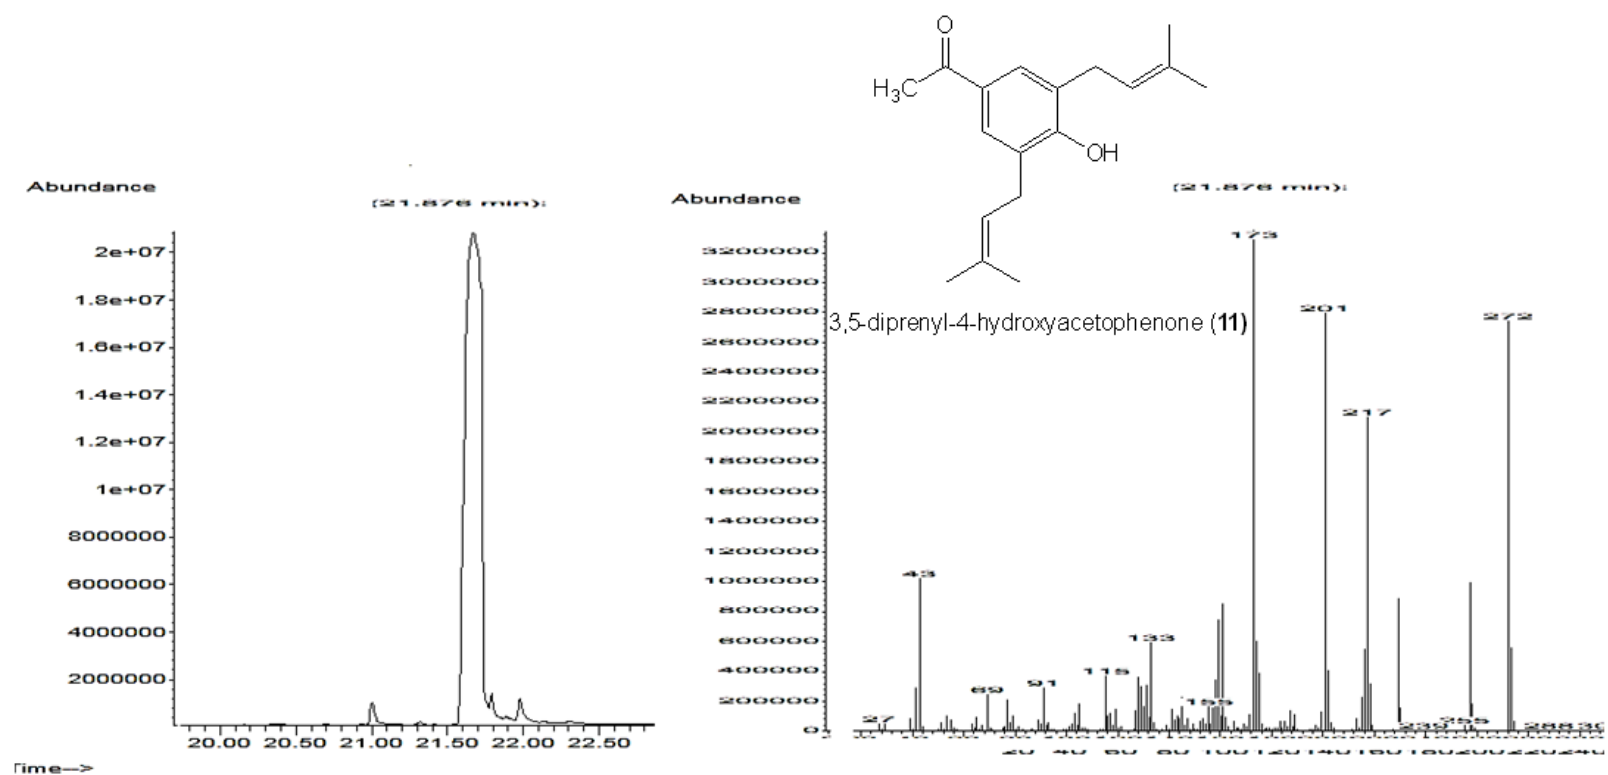

Figure S18c. GC-MS chromatograms of compound **11**.

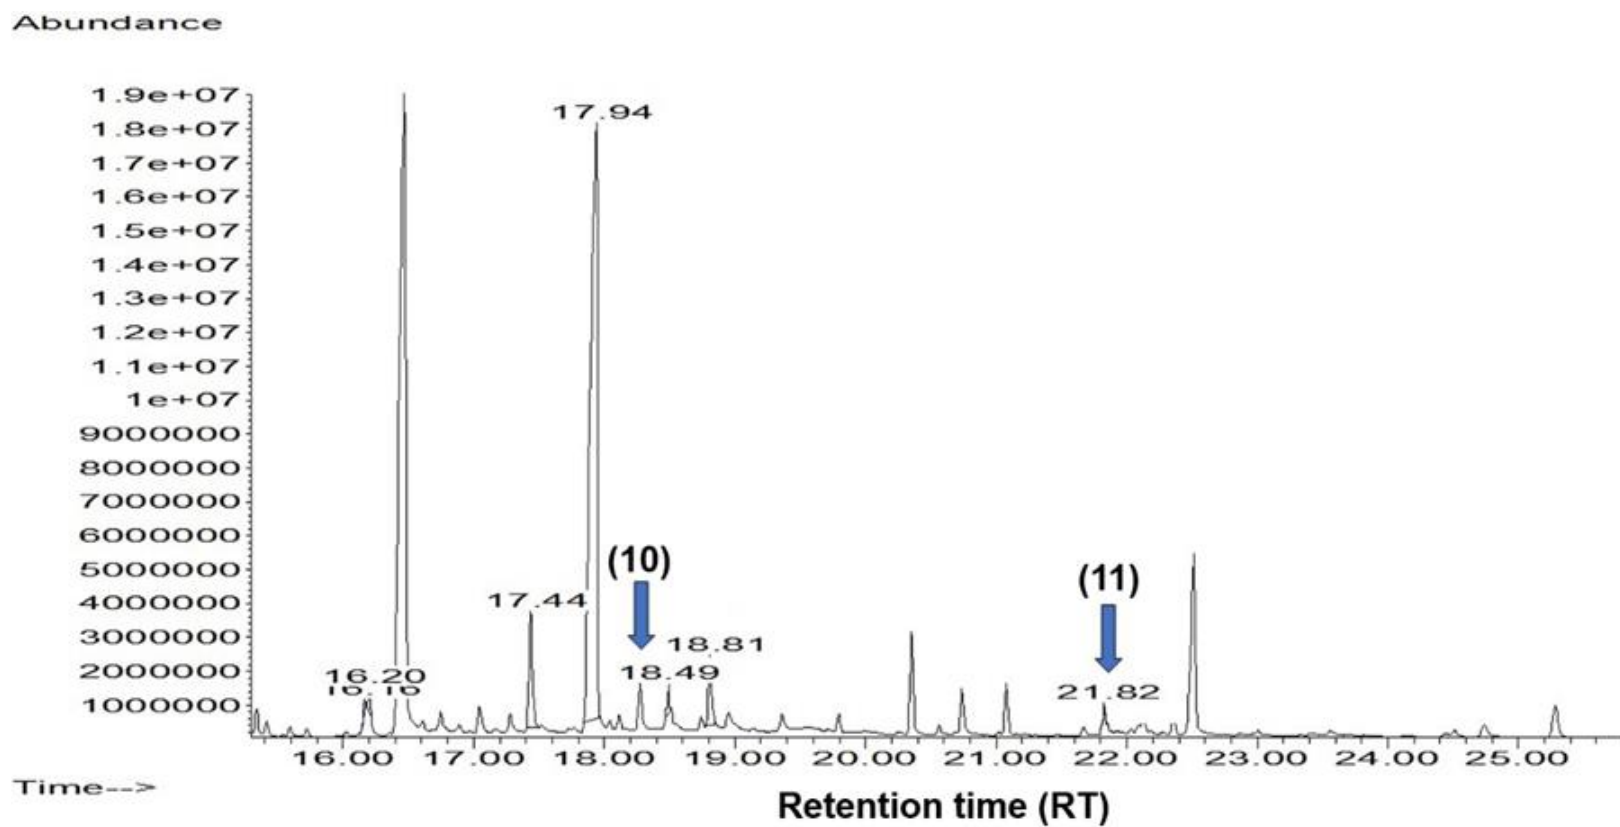

**Figure S18d.** GC-MS chromatograms of the compounds encecalin (10) and 3,5-diprenyl-4-hydroxyacetophenone (11) obtained of the ethyl acetate extract from *A. pichinchensis* cell suspension cultures.

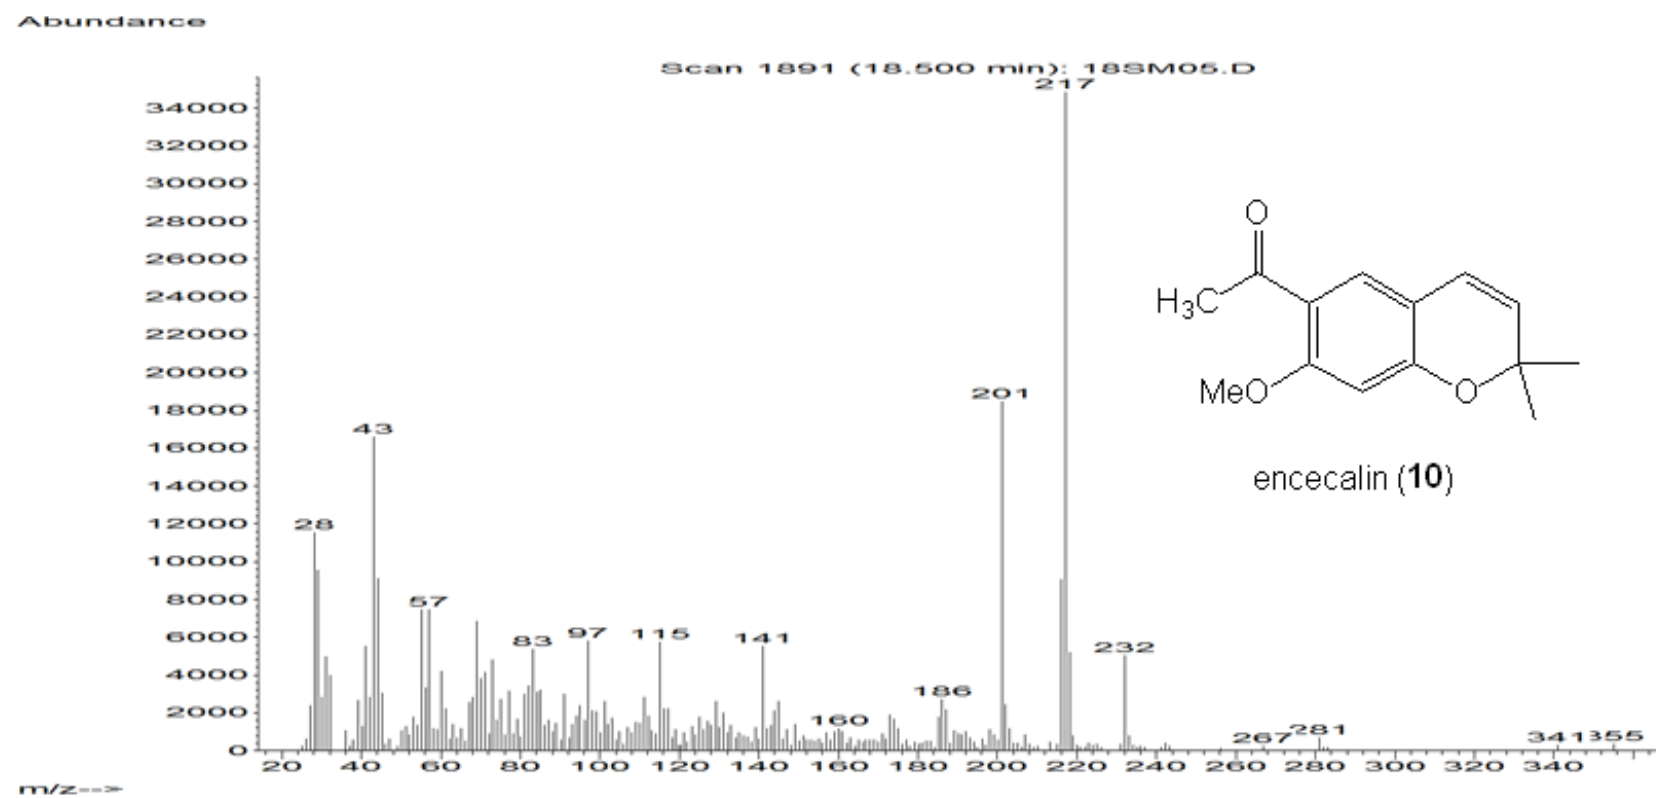

Figure S18e. GC-MS chromatogram of compound 10 obtained from acetate ethyl extract of cell suspension cultures.

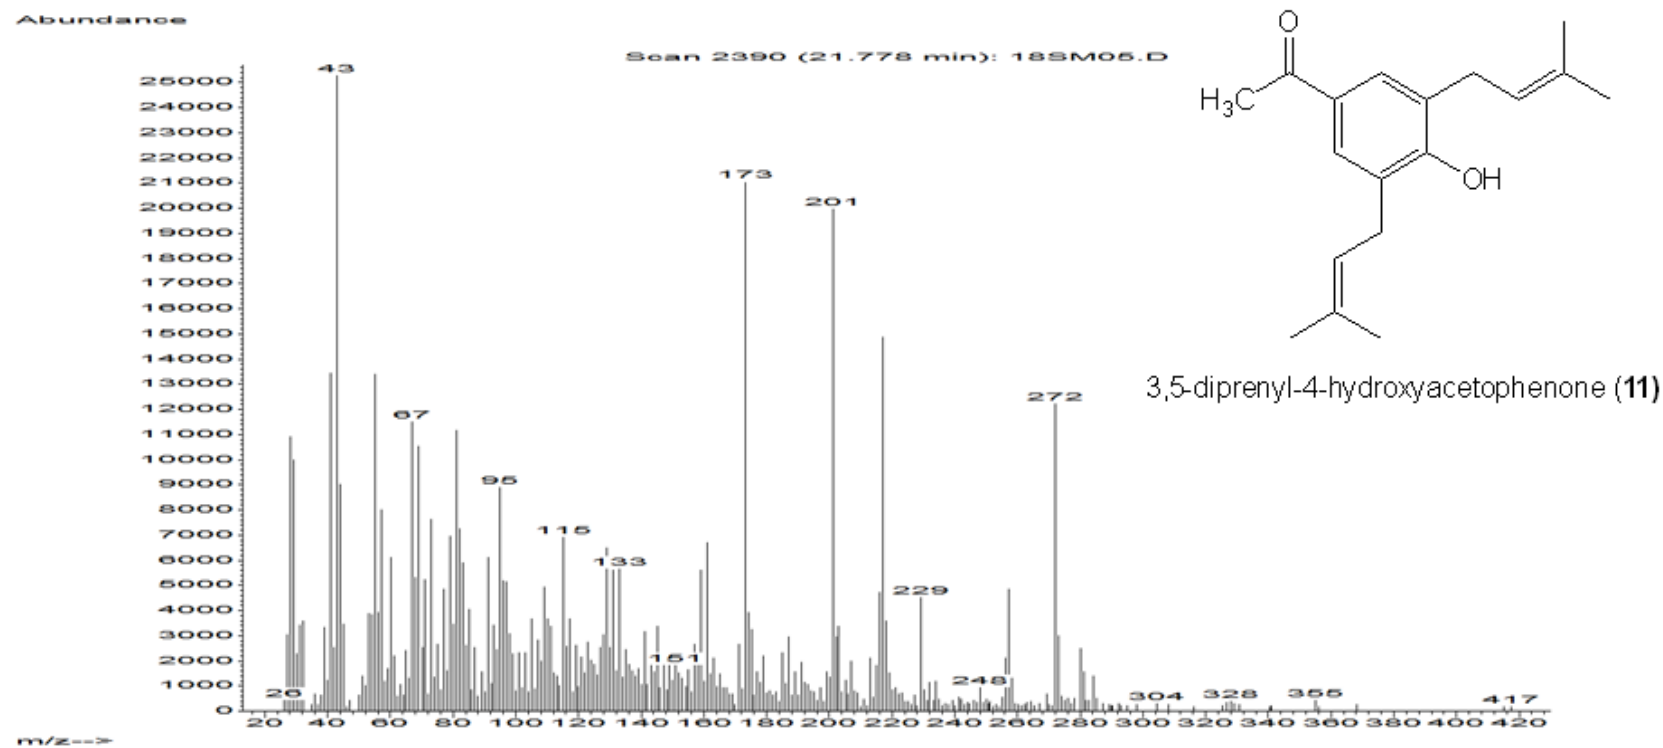

**Figure S18f.** GC-MS chromatogram of compound **11** obtained from acetate ethyl extract of cell suspension cultures.

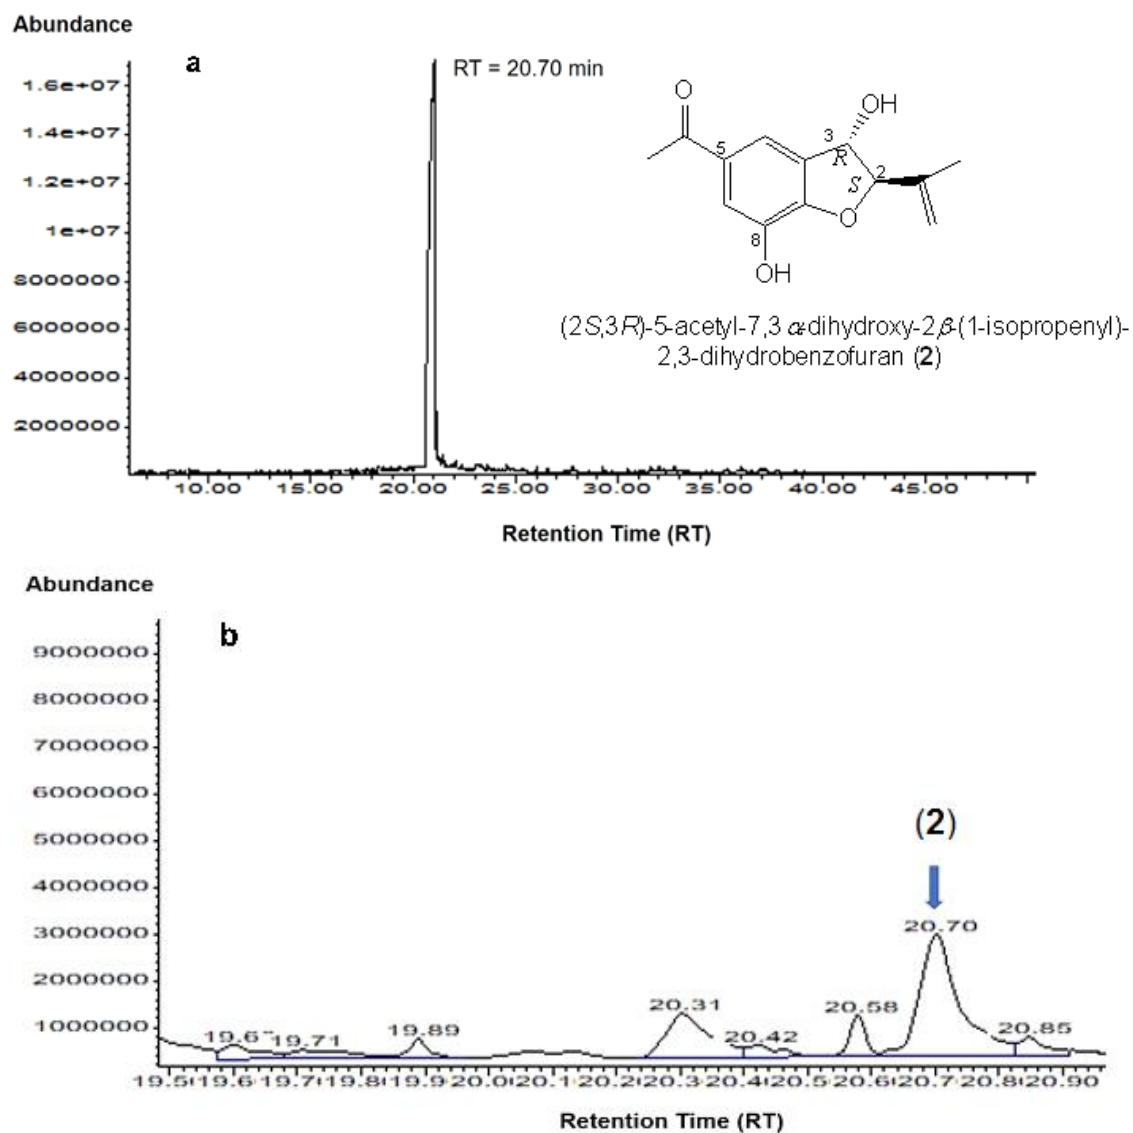

**Figure S19.** GC-MS chromatograms of standard compound and EtOAc extract. (a) 2,3-dihydrobenzofuran (**2**) profile used as a standard; (b) EtOAc extract profile from *A. pichinchensis* cell suspension culture at 8 days of culture showing the peak of 2,3-dihydrobenzofuran (**2**) compound.

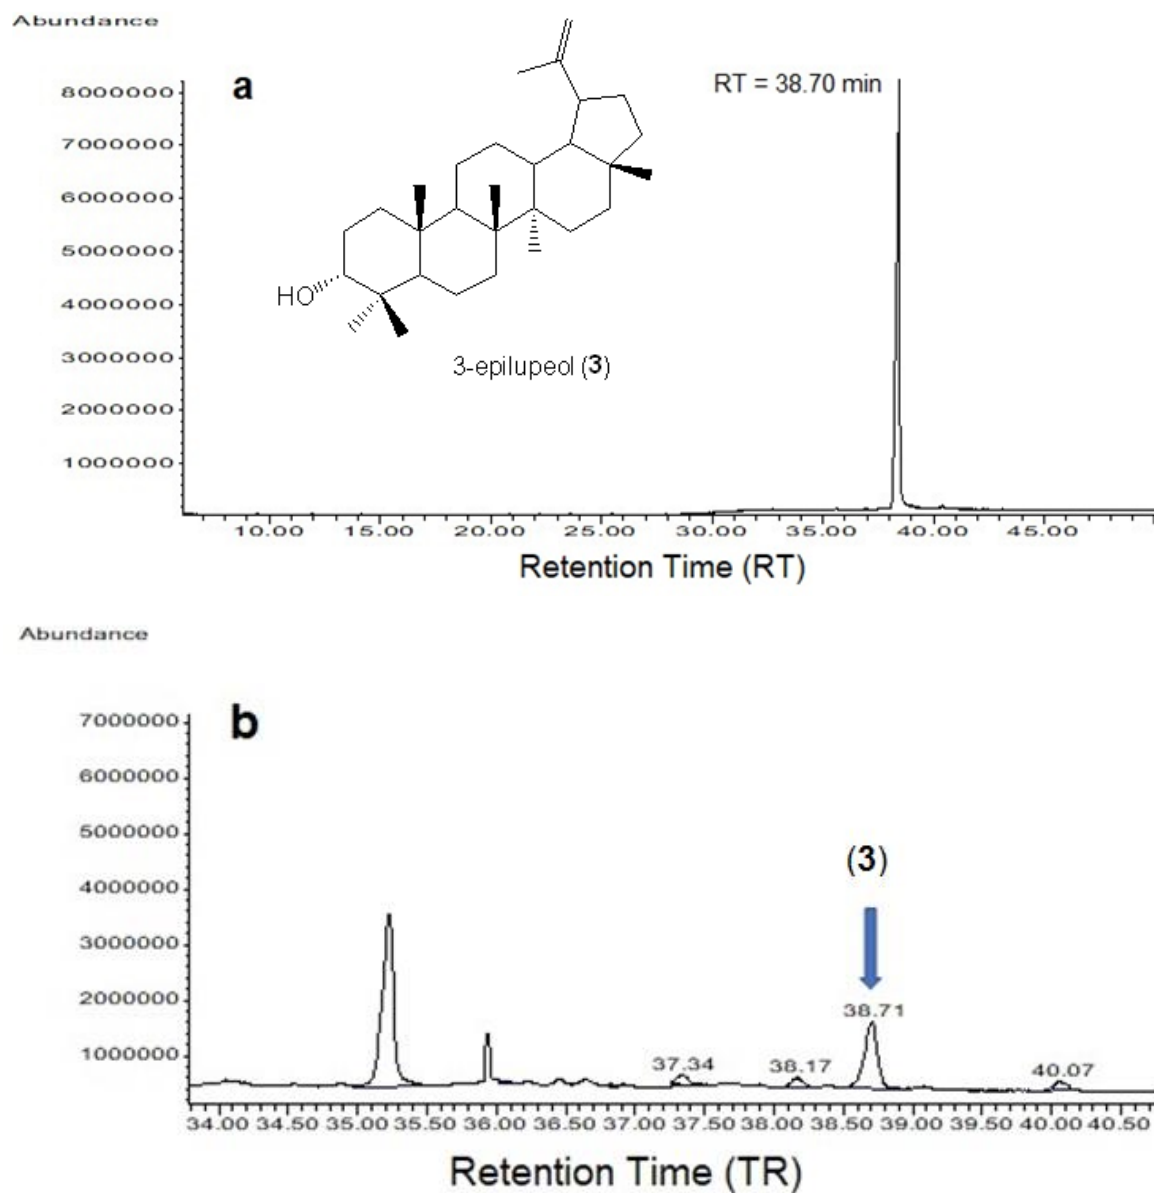

**Figure S20.** GC-MS chromatograms of standard compound and EtOAc extract. (a) 3-epilupeol (3) profile used as a standard; (b) EtOAc extract profile from *A. pichinchensis* cell suspension culture at 16 days of culture showing the peak of 3-epilupeol (3) compound.
